# 1 Superresolution microscopy reveals partial preassembly and subsequent bending of 2 the clathrin coat during endocytosis

3  
4 Markus Mund\*<sup>1,2</sup>, Aline Tschanz\*<sup>1,3</sup>, Yu-Le Wu<sup>1,3</sup>, Felix Frey<sup>4</sup>, Johanna L. Mehl<sup>1,5</sup>, Marko  
5 Kaksonen<sup>2,6</sup>, Ori Avinoam<sup>1,7</sup>, Ulrich S. Schwarz<sup>8,9</sup>, Jonas Ries<sup>1,#</sup>

6  
7 <sup>1</sup> European Molecular Biology Laboratory, Cell Biology and Biophysics, Meyerhofstrasse 1,  
8 69117 Heidelberg, Germany.

9 <sup>2</sup> University of Geneva, Department of Biochemistry, Quai Ernest-Ansermet 30, 1205 Geneva,  
10 Switzerland.

11 <sup>3</sup> Candidate for Joint PhD Programme of EMBL and University of Heidelberg.

12 <sup>4</sup> Kavli Institute of Nanoscience, Department of Bionanoscience, Delft University of  
13 Technology, Van der Maasweg 9, 2629 HZ Delft, The Netherlands.

14 <sup>5</sup> Present address: ETH Zurich, Switzerland.

15 <sup>6</sup> University of Geneva, NCCR Chemical Biology, Geneva, Switzerland.

16 <sup>7</sup> Weizmann Institute of Science, Department of Biomolecular Sciences, Herzl St 234, Rehovot,  
17 Israel.

18 <sup>8</sup> Institute for Theoretical Physics and Bioquant, Heidelberg University, Philosophenweg 19,  
19 69120 Heidelberg, Germany.

20 <sup>9</sup> Bioquant, Heidelberg University, Im Neuenheimer Feld 267, 69120 Heidelberg, Germany.

21 \*equal contribution

22 # Correspondence: [Jonas.ries@embl.de](mailto:Jonas.ries@embl.de)

23

## 24 Abstract

25 Eukaryotic cells use clathrin-mediated endocytosis to take up a large range of  
26 extracellular cargos. During endocytosis, a clathrin coat forms on the plasma membrane, but  
27 it remains controversial when and how it is remodeled into a spherical vesicle.

28 Here, we use 3D superresolution microscopy to determine the precise geometry of the  
29 clathrin coat at large numbers of endocytic sites. Through pseudo-temporal sorting, we  
30 determine the average trajectory of clathrin remodeling during endocytosis. We find that  
31 clathrin coats assemble first on flat membranes to 50% of the coat area, before they become  
32 rapidly and continuously bent, and confirm this mechanism in three cell lines. We introduce  
33 the *cooperative curvature model*, which is based on positive feedback for curvature  
34 generation. It accurately describes the measured shapes and dynamics of the clathrin coat  
35 and could represent a general mechanism for clathrin coat remodeling on the plasma  
36 membrane.

37

## 38 Introduction

39 Endocytosis is an essential function of eukaryotic cells to internalize molecules from their  
40 surface. The major endocytic pathway is clathrin-mediated endocytosis (CME), which  
41 supports the uptake of many diverse cargos including nutrients, signaling molecules,  
42 membrane proteins, and pathogens. During CME, a dense coat of proteins self-assembles on  
43 the inner leaflet of the plasma membrane. The membrane itself is bent into an  $\Omega$ -shaped  
44 invagination that is eventually pinched off to form a coated vesicle, completing endocytosis  
45 (Kaksonen and Roux, 2018).

46 The major component of the coat are clathrin triskelia, which comprise three heavy and  
47 three light chains (Fotin et al., 2004). When triskelia are bound to the plasma membrane by  
48 adaptor proteins, they form ordered clathrin lattices. The structural flexibility of triskelia  
49 allows these lattices to adapt variable ratios of predominantly pentagonal and hexagonal  
50 faces, forming both flat and curved geometries.

51 Both geometries have been observed *in vivo* and *in vitro*, and their structure has been  
52 well characterized *in vitro* from a structural biology perspective (Cheng et al., 2007;  
53 Dannhauser and Ungewickell, 2012; Fotin et al., 2004; Heuser and Kirchhausen, 1985; Morris  
54 et al., 2019; Pearse, 1976; Smith et al., 1998; Takei et al., 1998; Ungewickell and Branton,  
55 1981). However, it remains elusive how clathrin coat formation and membrane bending are  
56 temporally and causally related during endocytosis in cells.

57 In EM micrographs, it was observed early on that clathrin lattices can assume many  
58 different curvatures in cells (Heuser, 1980). Since then, two main models of clathrin coat  
59 formation during endocytosis have been put forward. In the *constant area model (CAM)*,  
60 clathrin grows to its final surface area as a flat coat, which then becomes continuously more  
61 curved until vesicle formation is complete. This model assumes that all the differently curved  
62 clathrin structures are endocytic intermediates. Early observations suggested the presence of  
63 pentagonal and hexagonal faces in isolated coated vesicles (Kanaseki and Kadota, 1969).  
64 Combined with the observation of flat lattices being enriched in hexagons, it was suggested  
65 that the integration of at least 12 pentagonal faces is a prerequisite for the formation of a  
66 spherical structure (Heuser, 1980). However, this would require extensive lattice remodeling  
67 which was deemed thermodynamically and structurally unfavorable and thus unlikely to  
68 occur (Kirchhausen, 1993). The *constant curvature model (CCM)* was therefore formulated,  
69 which assumes that flat clathrin structures are not endocytic precursors. Instead, it was  
70 proposed that the endocytic clathrin coat assumes its final curvature, i.e. the curvature of the  
71 vesicle, directly from the start, while continuously growing in surface area over time.

72 The constant curvature model had been prevalent in the field, but was recently challenged by  
73 reports that flat clathrin coats can indeed change curvature during endocytosis (Avinoam et  
74 al., 2015; Bucher et al., 2018; Scott et al., 2018). This has once again boosted interest in  
75 clathrin remodeling (Chen and Schmid, 2020; Kaksonen and Roux, 2018; Sochacki and  
76 Taraska, 2018). Recent years have seen numerous studies based on diverse methods that did  
77 not converge on a common result. Reports supported either the constant area model

78 (Avinoam et al., 2015; Sochacki et al., 2021), the constant curvature model (Willy et al., 2021),  
79 a combination of both models (Bucher et al., 2018; Tagiltsev et al., 2021; Yoshida et al., 2018)  
80 or the simultaneous existence of both models within cells (Scott et al., 2018). To conclusively  
81 understand this complex process, it would be desirable to directly visualize the three-  
82 dimensional nanoscale structure of the endocytic clathrin coat in living cells. Unfortunately,  
83 however, to date no method offers the necessary spatial and temporal resolution to do that.  
84 Here, we aim to circumvent this limitation by densely sampling the entire endocytic process  
85 in fixed cells, and subsequently reconstructing the dynamic information.

86 We developed a superresolution microscopy approach to quantitatively study the three-  
87 dimensional (3D) clathrin coat architecture at endocytic sites. We used a novel model fitting  
88 framework to extract geometric parameters that allowed us to sort static images of clathrin  
89 lattices according to their progression along the endocytic timeline. The inferred endocytic  
90 dynamics allowed us to reconstruct the stereotypic remodeling of clathrin during endocytosis  
91 at the nanoscale.

92 In summary, we found that a clathrin coat first partially assembles on a flat membrane,  
93 and then simultaneously grows in surface area and coat curvature. While initial bending  
94 occurs rapidly, it later slows down and endocytic sites are eventually paused in a state of high  
95 curvature before vesicle scission. This trend is conserved across cell lines, suggesting it is a  
96 common attribute that is not affected by cell type. Based on this data, we developed a new  
97 kinetic growth model, the *cooperative curvature model (CoopCM)*. It describes coat area  
98 growth as addition of clathrin to the lattice edge with a constant rate and assumes that the  
99 curvature of the coat increases towards a preferred curvature, driven by the cooperative  
100 interplay of clathrin triskelia within the lattice. The CoopCM predicts a fast initial curvature  
101 increase that is slowed down progressively as the coat becomes spherical, and shows  
102 excellent agreement with experimental data.

103

## 104 Results

### 105 *Quantitative 3D superresolution imaging of clathrin structures*

106 Here, we used 3D single-molecule localization microscopy (SMLM) to systematically  
107 determine the precise geometry of individual clathrin-coated structures at the plasma  
108 membrane. For this, we optimized the sample preparation to label clathrin at endocytic sites  
109 as densely as possible using indirect immunofluorescence with polyclonal antibodies against  
110 clathrin light and heavy chains, which was crucial to achieve high quality SMLM (Mund and  
111 Ries, 2020). We then localized sparsely activated single fluorophores by fitting an  
112 experimentally derived model of the astigmatic point-spread function using a method we  
113 developed recently (Li et al., 2018). This improved the resolution to about 10 nm in x/y and  
114 30 nm in z (based on modal values of the localization precision at 3.9 nm in x/y and 12.5 nm  
115 in z, see Methods), and reduced typically observed image distortions. The achieved image  
116 quality allowed us to clearly visualize and quantify the 3D clathrin coat shape at different  
117 stages of endocytic site maturation (Figure 1A-C).

118 The large majority of sites were single structures that were well-isolated from each other,  
119 and exhibited great structural diversity. In addition, we noted several clusters of closely  
120 juxtaposed endocytic sites (Supplementary Figure 1A). In the isolated sites, we observe a  
121 variety of shapes including flat, curved, dome-shaped and spherical structures of different  
122 sizes (Figure 1C), indicating that endocytosis has been arrested by fixation at different time  
123 points during endocytic progression.

124 To quantify size and shape of individual clathrin coats, we used LocMoFit, a  
125 computational pipeline based on a maximum-likelihood model fitting framework that we  
126 developed previously (Wu et al., 2021). This framework directly fits 3D geometric models to  
127 the 3D point cloud of localizations (Figure 1D-E) instead of rendered images, and thereby  
128 harnesses the full information contained in the SMLM data, including for instance the  
129 localization precision, rather than just spatial coordinates.

130 We describe the clathrin coat as a spherical cap that is defined by a radius  $r$  and a closing  
131 angle  $\theta$  (Figure 1E). Our model also accounted for coat thickness, antibody size and blurring  
132 due to the localization precision (Methods). Hence, it describes both shallow and highly  
133 curved structures equally well. Moreover, because  $\theta$  increases during endocytosis from  $0^\circ$  at  
134 flat sites to  $180^\circ$  at complete vesicles, we could use this parameter to sort the individual  
135 images according to endocytic progress (Figure 1D).

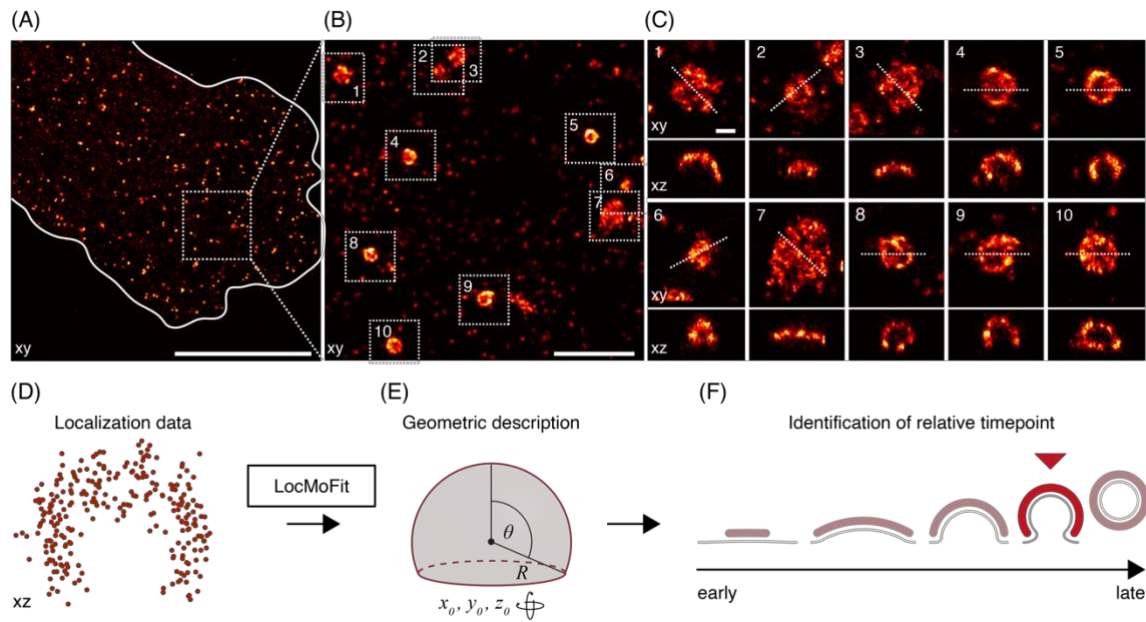

136

137 **Figure 1 – 3D SMLM of clathrin-coated structures.** (A) 3D SMLM image of clathrin immunolabeled with AF647  
 138 at the bottom membrane of a SK-MEL-2 cell. (B) Enlarged view of the region indicated in (A). (C) All structures  
 139 found in (B) are shown in top view (xy) and as 50 nm-thick z-slices (xz), orientation of slice indicated by dotted  
 140 line). Scale bars are 10  $\mu\text{m}$  (A); 1  $\mu\text{m}$  (B); and 100 nm (C). (D) Geometric analysis pipeline. All clathrin coats are  
 141 segmented, and their localizations are directly fitted with a spherical cap model using the fitting framework  
 142 LocMoFit (Wu et al., 2021). (E) In LocMoFit, individual clathrin coats are parametrized by their size (radius  $R$ ),  
 143 closing angle  $\theta$ , position  $(x_0, y_0, z_0)$  and 3D orientation. (E) Using  $\theta$  as a proxy for endocytic progression, the  
 144 relative endocytic time point for each structure can be determined.

### 145 **The clathrin coat grows in area and becomes more curved during endocytosis**

146 We first imaged immunostained clathrin in chemically fixed SK-MEL-2 cells, where we  
 147 focused on the bottom plasma membrane that was densely covered by endocytic sites. These  
 148 cells have been extensively studied and are established model cells for clathrin-mediated  
 149 endocytosis with well-characterized endocytic dynamics (Aguet et al., 2013; Avinoam et al.,  
 150 2015; Doyon et al., 2011; Kaplan et al., 2020). Using the 3D model fitting pipeline, we  
 151 determined radius  $R$ , closing angle  $\theta$ , position and rotation of 1798 endocytic sites from 13  
 152 cells (Figure 2A) with high accuracy (Supplementary Figure 2). We found that two structural  
 153 intermediates are enriched, while others are rare and only a small fraction of sites were  
 154 completely flat (Figure 2B). Slightly curved sites with  $\theta \approx 70^\circ$  and strongly curved sites with  
 155  $\theta \approx 130^\circ$  were enriched, indicating that those structural states are more frequently found in  
 156 cells. We only rarely obtained sites with  $\theta \approx 180^\circ$ , which would be expected for complete  
 157 spherical coats, even though fully formed vesicles are found in our data (Supplementary  
 158 Figure 1B). This indicates that at the time point of scission, the clathrin coat of nascent vesicles  
 159 is still incomplete at the neck, or that the kinetics of scission are too transient for detection.  
 160 Deeply invaginated clathrin coated pits could further be sheared off during sample  
 161 preparation, thus evading our detection. Curvatures  $H = 1/R$  ranged from 0 to  $0.022 \text{ nm}^{-1}$

162 with a median of  $0.011 \text{ nm}^{-1}$ , corresponding to a median radius of 87 nm, and surface areas  
163 ranged from  $9,000 \text{ nm}^2$  to  $140,000 \text{ nm}^2$  with a median of  $54,000 \text{ nm}^2$ . These values agree well  
164 with previous measurements of the vesicular coat using EM (Avinoam et al., 2015), median  
165 curvature  $0.015 \text{ nm}^{-1}$ , median surface  $54,500 \text{ nm}^2$ ).

166 We then wanted to understand how the clathrin coat geometry changes during  
167 endocytosis. To this end, we used the closing angle parameter  $\theta$  to sort endocytic sites  
168 relative to each other in time. Irrespective of whether endocytosis follows a constant  
169 curvature or constant area model,  $\theta$  monotonically increases from early to late endocytic  
170 time points (Figure 2C), and can thus be used as unbiased proxy for endocytic progression  
171 (Avinoam et al., 2015).

172 The curvature  $H$  was strongly correlated with  $\theta$ , indicating that coat curvature increases  
173 continuously during endocytosis (Figure 2D). Similarly, the surface area increased from  $32,000$   
174  $\text{nm}^2$  (median of 5% of sites with smallest theta) to  $50,000 \text{ nm}^2$  (median of 5% of sites with  
175 highest theta). The projected area decreased from  $31,000 \text{ nm}^2$  to  $13,000 \text{ nm}^2$  (median of 5%  
176 of sites with lowest and highest theta respectively), which is in close agreement with previous  
177 EM measurements (Bucher et al., 2018). It is readily obvious that our data are incompatible  
178 with the constant curvature model, as the curvature is not constant, but increases  
179 monotonically with  $\theta$ . Just as clearly, our data do not support the constant area model,  
180 because the coat surface also increases during endocytosis.

181 Almost all data points are part of one continuous point cloud (Figure 2D), indicating a  
182 continuous transition between structural states during endocytosis. We noticed an additional  
183 small, disconnected set of data points representing 8.5% of all sites that correspond to  
184 endocytic sites with curvatures above  $0.016 \text{ nm}^{-1}$  and  $\theta$  of  $80^\circ$ - $180^\circ$  (Figure 2D, and example  
185 structures in Supplementary Figure 3). In a control experiment to check whether these are  
186 endocytic structures, we selectively analyzed clathrin structures that colocalized with AP-2, a  
187 bona fide marker for CME. We did not observe AP-2 in any of the disconnected sites, from  
188 which we conclude that they indeed do not belong to CME. These small structures could  
189 represent coated vesicles from the *trans* Golgi (Supplementary Figure 4).



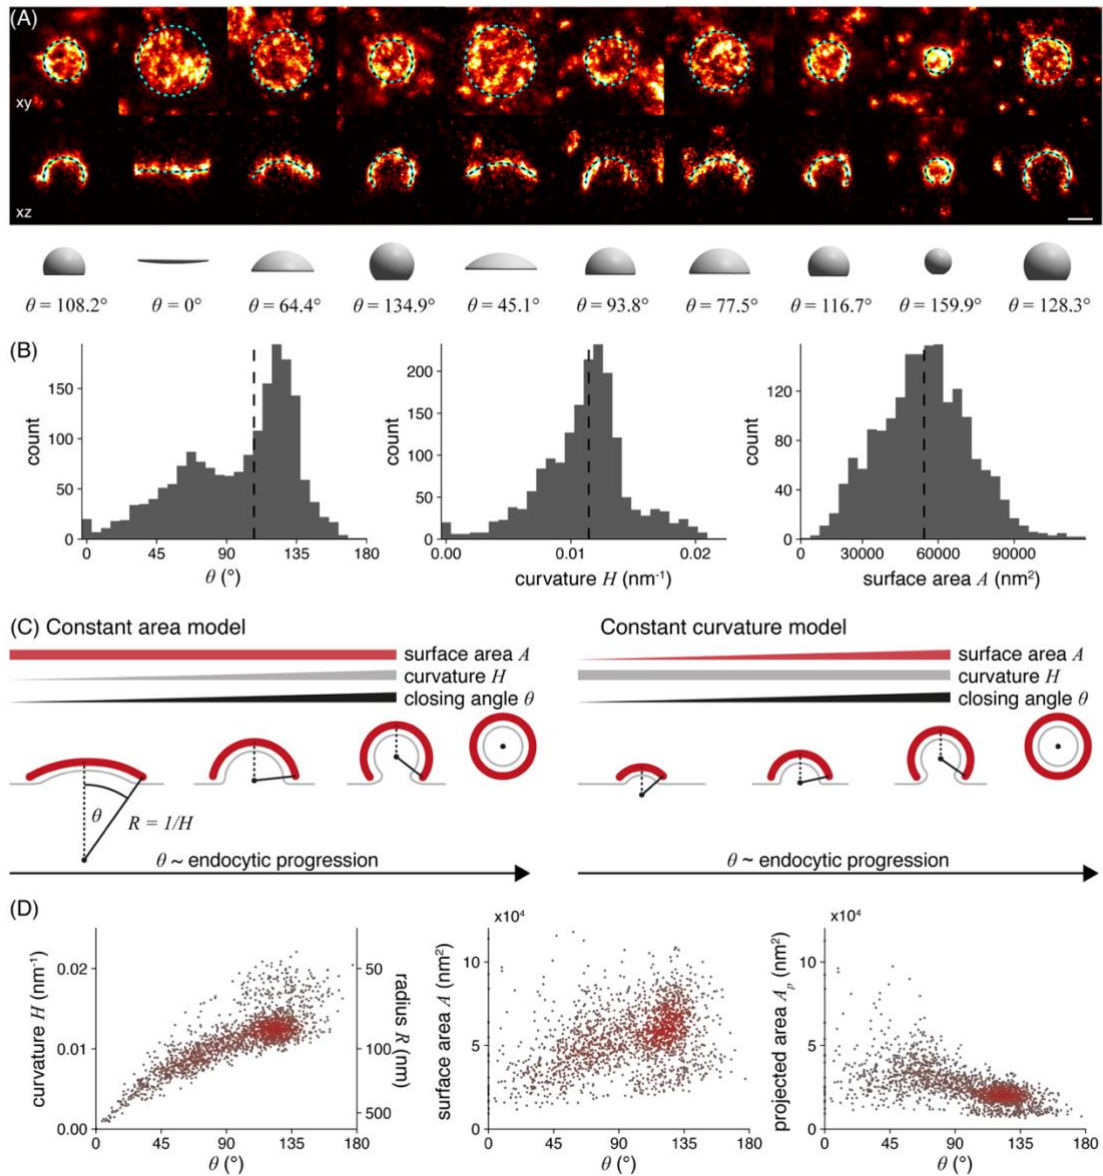

190

191 **Figure 2 – Quantitative analysis of clathrin-coated structures in SK-MEL-2 cells.** (A) Clathrin coat geometry is  
 192 quantified using LocMoFit. The fitted spherical cap model is drawn as circle with its outer radius (top row, xy), as  
 193 cross-sectional profile (50 nm xz slices, middle row), and as surface with the corresponding closing angle  
 194  $\theta$  (bottom row). Scale bar 100 nm. (B) Distributions of closing angle  $\theta$  (median =  $108^\circ$ ), curvature  $H$  (median =  
 195  $0.011 \text{ nm}^{-1}$ ) and surface area  $A$  (median =  $54,000 \text{ nm}^2$ ) of endocytic sites in SK-MEL-2 cells ( $n = 1798$  sites,  $N = 13$   
 196 cells) as determined from the model fit. (C) Two previously proposed mechanistic models for clathrin coat  
 197 assembly during endocytosis (for details see text). In both scenarios  $\theta$  increases monotonically and is thus a  
 198 proxy for endocytic progression. (D) Development of curvature, surface area and projected area of the clathrin  
 199 coat during endocytosis. Color indicates point density.

200

## 201 ***The cooperative curvature model of clathrin coat remodeling***

202 Our data clearly showed that clathrin coats grow and become more curved as the plasma  
203 membrane gets bent to produce a vesicle. Because the data quantitatively describes all 3D  
204 geometries that the endocytic clathrin coat assumes, it allowed us to move towards a  
205 mathematical model of clathrin coat formation during endocytosis.

206 Here, we introduce the *Cooperative Curvature Model (CoopCM)*, which describes coat  
207 growth based on known structural and dynamical properties of clathrin coats (Figure 3A).  
208 Firstly, we assume that the clathrin coat starts growing on a flat membrane. While triskelia  
209 have been shown to exchange dynamically during endocytosis (Avinoam et al., 2015), net  
210 growth of the area  $A$  occurs via the addition of triskelia at the lattice edge  $\mathcal{E}$  with a constant  
211 growth rate  $k_{\text{on}}$  (Equation 1).

$$212 \quad \frac{d}{dt}A = \dot{A} = k_{\text{on}}\mathcal{E} \quad (1)$$

213 Moreover, we assume that the intrinsic pucker angle of individual triskelia and their  
214 interactions in a lattice together translate into an overall preferred curvature  $H_0$  of the  
215 clathrin coat as a whole. However, the initially flat assembly suggests that this preferred  
216 curvature cannot be realized in an immature lattice. We hypothesize that cooperative  
217 processes in the coat are required to increase curvature. Coat curvature  $H$  then increases  
218 asymptotically towards  $H_0$  at an initial rate  $\gamma$ , slowing down towards zero when the preferred  
219 curvature is reached (Equation 2).

$$220 \quad \frac{d}{d\theta}H = \gamma \left(1 - \frac{H^2}{H_0^2}\right) \quad (2)$$

221 Choosing a quadratic dependence of the rate of curvature change on curvature is a simple  
222 way to represent cooperativity in the lattice, which recently has been demonstrated in  
223 experiments (Sochacki et al., 2021; Zeno et al., 2021) and fits our data more accurately than  
224 the linear relationship, which would correspond to a less cooperative process (Supplementary  
225 Note). Equation 2 can be solved analytically to yield an expression of the curvature  $H$   
226 depending on  $\theta$  (Equation 3), which can then be fitted to our data.

$$227 \quad H(\theta) = H_0 \tanh\left(\frac{\gamma\theta}{H_0}\right) \quad (3)$$

228 Analogous expressions for other geometric parameters like surface area can be derived  
229 straightforwardly.

230 The fit of this CoopCM to the data of curvature  $H$  in relation to closing angle  $\theta$  shows  
231 excellent agreement (Figure 3B). In comparison, the CAM fitted the curvature data slightly  
232 worse than the CoopCM, and the constant curvature model agreed poorly with the data. The  
233 improved fit of the CoopCM compared to the CAM or CCM is not a result of the additional  
234 fitting parameter, as we showed using the Bayesian Information Criterion (see Supplementary  
235 Note).



236 From the curvature fits, we calculated the corresponding curves for surface area (Figure  
 237 3C) and the edge length of the clathrin coat (Figure 3D). The edge length decreases  
 238 monotonically and approaches zero at  $\theta = 180^\circ$ , thereby stopping growth according to  
 239 Equation 1. Both graphs again highlight the very close agreement of the model prediction  
 240 with the experimental data. From the fit, we determined that invagination occurs when about  
 241 half of the total coat area has grown ( $A_0 = 0.51$ ), and that the preferred curvature of a  
 242 clathrin coat is  $H_0 = 0.014 \text{ nm}^{-1}$ , corresponding to a radius of  $R_0 = 72 \text{ nm}$ . The model yields  
 243 nearly identical parameters when surface area or rim length are fitted instead of curvature  
 244 (Table 1), highlighting its robustness.

245 We then decided to test if the observed mode of clathrin remodeling is specific for SK-  
 246 MEL-2 cells. For this, we analyzed the endocytic clathrin ultrastructure also in U2OS cells and  
 247 3T3 mouse fibroblasts (Supplementary Figure 5 and Table 2-3). In these cell lines, just like in  
 248 SK-MEL-2 cells, the curvature as well as the surface area continuously increase throughout  
 249 endocytosis. We observe that the preferred curvature of the clathrin coat is smaller in U2OS  
 250 ( $H_0 = 0.012 \text{ nm}^{-1}$ ,  $R_0 = 85 \text{ nm}$ ) and 3T3 cells ( $H_0 = 0.011 \text{ nm}^{-1}$ ,  $R_0 = 89.7 \text{ nm}$ ) compared  
 251 to SK-MEL-2 ( $H_0 = 0.014 \text{ nm}^{-1}$ ,  $R_0 = 72 \text{ nm}$ ). This suggests that the average size of vesicles  
 252 formed in CME is cell line specific. The fraction of the surface area acquired on the flat  
 253 membrane is very similar for all three cell lines, with U2OS derived sites initiating curvature  
 254 at  $A_0 = 0.52$  and 3T3 sites at  $A_0 = 0.45$  (Table 2-3). Taken together, we have shown in  
 255 several cell lines that clathrin coats neither grow via constant curvature or constant area  
 256 pathways, but rather first grow flat and then acquire curvature and more surface area  
 257 simultaneously, with a non-linear mode of curvature generation.

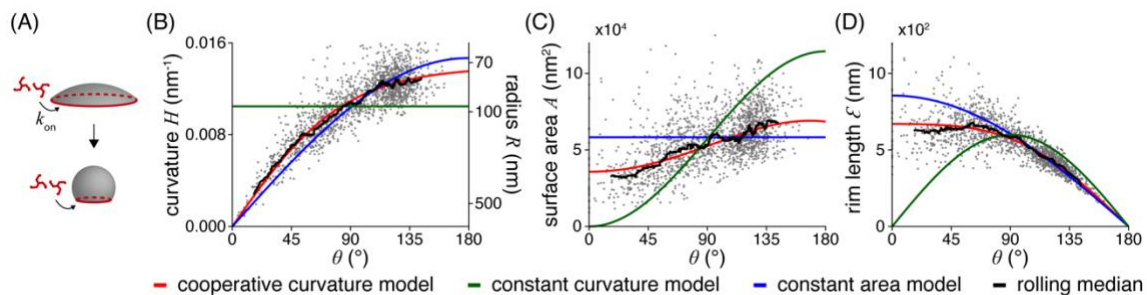

258

259 **Figure 3 – Model for clathrin coat growth.** (A) Schematic of the cooperative curvature model, where clathrin  
 260 lattices grow by addition of triskelia to the rim at a constant growth rate  $k_{\text{on}}$ . Curvature generation is driven  
 261 towards a preferred curvature, ultimately creating a spherical vesicle. (B) Distinct clathrin growth models and  
 262 rolling median (window width = 82 sites) fitted to curvature over  $\theta$ . The resulting fitting parameters are then  
 263 used to map the same models also over (C) surface area and (D) rim length. ( $n = 1645$  sites,  $N = 13$  cells).

264

265

## 266 **Temporal reconstruction of structural dynamics in endocytosis**

267 We systematically segment all endocytic sites in the superresolution images, and thereby  
268 obtain a large dataset where all endocytic time points are sampled homogenously. The  
269 distribution of structural states within the dataset is thus representative of their lifetime, with  
270 long-lived, stable curvature states being overrepresented in the data compared to transient  
271 states. This opens up the possibility to reconstruct the temporal progression of clathrin  
272 remodeling during endocytosis, and to ask whether clathrin coats acquire their curvatures  
273 with a constant rate, or if there are certain curvature transitions that occur more rapidly than  
274 others.

275 For this, we sorted all endocytic sites by  $\theta$ . The rank of an endocytic site thus corresponds  
276 to its pseudotime, which describes its relative time point between 0 and 1 along the endocytic  
277 trajectory (Figure 4A).

278 As our model (Equation 1) describes the dynamic growth of the clathrin coat, we can solve  
279 it to derive an expression for  $\theta$  over time  $t$  (Equation 4), where the coat starts out flat and  
280 then starts to generate curvature, increasing  $\theta$  over time.

$$281 \quad \theta(t) = \sqrt{\frac{24\gamma k_{\text{on}}}{8\gamma^2 H_0^{-2} - 1} t} \quad (4)$$

282 The square root dependence of  $\theta$  on time  $t$  reflects the slowing down of curvature  
283 generation as the clathrin coat approaches its preferred curvature. This expression fits the  
284 pseudotime-resolved data remarkably well (Figure 4B). Consistent with our previous  
285 reasoning, a linear model did not agree well with the data (Supplementary Note), since it gives  
286 a linear invagination speed for small  $t$ , emphasizing the validity of our cooperative curvature  
287 model, which leads to the characteristic square root dependence. The data slightly deviates  
288 from the model in the early phase, and more notably in the very end for pseudotimes close  
289 to 1. This potentially indicates that clathrin geometry is influenced by other factors besides  
290 the coat itself close to vesicle scission.

291 Because this pseudotime resolved dataset was generated from a large number of  
292 endocytic sites in many cells, we effectively generated the average trajectories of how  
293 curvature, surface area, projected area and lattice edge change during endocytosis in SK-MEL-  
294 2 cells (Figure 4C-F). We observe comparatively few flat clathrin coats. This shows that clathrin  
295 lattices are only transiently flat in the beginning of endocytosis, and might represent an  
296 energetically unfavorable conformation (Figure 4B). A fast transitions from a flat to a curved  
297 structure could further be mediated independently of clathrin coat (Zhao et al., 2017), e.g. by  
298 the action of BAR domain proteins (Henne et al., 2010), or at the base of filopodial projections.  
299 We further find comparatively many structures with a curvature of  $\theta \approx 70^\circ$  and  $\theta \approx 130^\circ$ ,  
300 indicating more long-lived endocytic stages. As the surface area is constantly increasing over  
301 pseudotime, we assume that the enrichment at  $\theta \approx 130^\circ$  represents a stalling point, where  
302 vesicles are formed by addition of final clathrin triskelia and potentially other factors that  
303 enable the recruitment and mechanic function of dynamin during vesicle scission. Similarly,

304 the enrichment at  $\theta \approx 70^\circ$  could be indicative of further recruitment of regulatory  
305 components, potentially supporting a previously suggested endocytic checkpoint (Loerke et  
306 al., 2009). This functional interpretation is supported by the observation of similar peaks in  
307 U2OS (at  $\theta \approx 60^\circ$  and  $\approx 130^\circ$ ) as well as 3T3 cells (at  $\theta \approx 50^\circ$  and  $\approx 130^\circ$ ).

308 Within the first 10% of pseudotemporal progression, the clathrin coat rapidly acquires  
309 shallow curvature of  $H = 0.007 \text{ nm}^{-1}$  ( $R = 134 \text{ nm}$ ). It then becomes gradually more bent up  
310 to  $\approx 60\%$  of the endocytic timeline, when the sites reach an average curvature of  $0.012 \text{ nm}^{-1}$   
311 ( $R = 83 \text{ nm}$ ). During the last  $\approx 40\%$  of progression, the curvature increase almost stops, until  
312 vesicle scission occurs. Interestingly, the earliest sites in our dataset already contain  $\approx 50\%$  of  
313 the surface area of the final vesicles, which is also reflected in the fitting results ( $A_0 = 0.51$ )  
314 (Figure 4E). This indicates that the initial assembly of the clathrin coat occurs very rapidly, or  
315 is in part below our detection limit.

316 We performed identical analyses for U2OS and 3T3 derived clathrin sites and obtained  
317 highly similar results as for SK-MEL-2 cells, indicating that this trajectory represents a general  
318 pathway for clathrin coat remodeling during endocytosis (Supplementary Figure 5 and Tables  
319 2-3). Finally, we made a 3D nanoscale movie, which vividly illustrates assembly and  
320 remodeling of the clathrin coat during endocytosis, from pseudotime resolved averages of  
321 our data (Figure 4G). This yielded a nanoscale pseudo-temporal movie of endocytosis in SK-  
322 MEL-2 cells (Supplementary Movie).

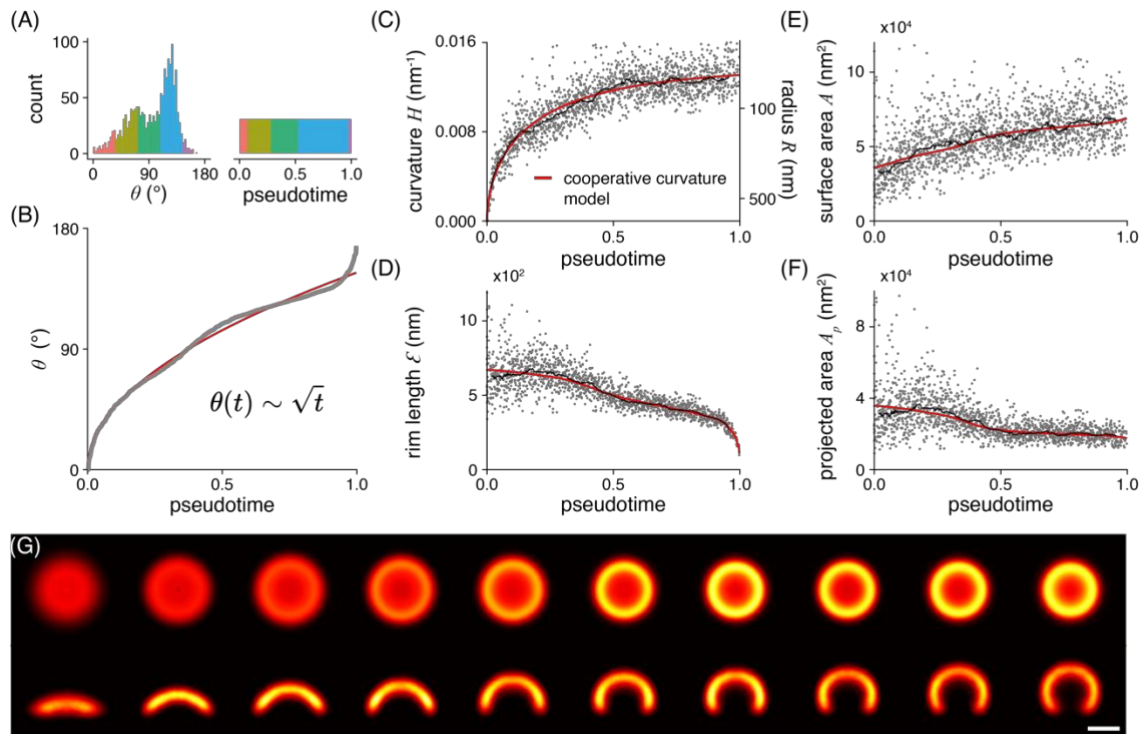

323

324 **Figure 4 – Temporal reconstruction of clathrin coat remodeling.** (A) Endocytic sites are sorted by  $\theta$  to  
 325 reconstruct pseudotime. Enriched  $\theta$  states, for example the peak at  $135^\circ$ , represent long-lived states that remain  
 326 for extended periods in pseudotime. Color code represents the same number of sites in both histograms. (B) The  
 327 square-root dependence between  $\theta$  and pseudotime approximated by the cooperative curvature model (red  
 328 line). (C) Curvature generation over pseudotime is approximated by the cooperative curvature model. Fit results  
 329 in (C) were used to describe (D) rim length, (E) surface area and (F) projected area change over pseudotime. A  
 330 rolling median (window of 82 sites) is plotted alongside (black line). (G) Superresolution averages for distinct  
 331 endocytic stages, resulting from all collected snapshots. Each bin contains the same number of snapshots of  
 332 clathrin-coated structures sorted along their pseudotime ( $n = 163$  per bin), so that all bins represent equally long  
 333 pseudotime intervals. Individual sites were rescaled to the median bin radius and aligned by their center  
 334 coordinates as well as rotation angles. Scale bar is 100 nm. ( $n = 1645$  sites,  $N = 13$  cells).

## 335 Discussion

### 336 *Quantitative description of clathrin coat ultrastructure*

337 The nature of clathrin assembly during endocytosis has become a classical question in cell  
338 biology that remains unresolved (reviewed in (Chen and Schmid, 2020; Sochacki and Taraska,  
339 2018)). There have been two main competing mechanistic models of how triskelia form a  
340 coat: the constant curvature model predicts that the clathrin coat assumes its final curvature  
341 directly from the start, while continuously increasing in surface area over time. In contrast,  
342 the constant area model predicts that clathrin grows to its final surface area as a flat coat,  
343 which then becomes continuously more curved until vesicle formation is complete.

344 Each model is supported by a number of studies, which mostly relied on electron  
345 microscopy techniques. Among them, 3D correlative electron tomography yields exquisite 3D  
346 endocytic membrane shapes (Avinoam et al., 2015), but can be tedious to extend towards  
347 large numbers of cells. Platinum replica electron microscopy offers large fields of view and  
348 thus superb throughput, but gives limited 3D resolution (Bucher et al., 2018; Sochacki et al.,  
349 2017).

350 We reason that the trajectory of clathrin coat assembly during endocytosis could best be  
351 determined by systematically imaging large numbers of endocytic sites with high 3D  
352 resolution. Therefore, we used SMLM that combines high 3D resolution with high throughput.  
353 Although lower than in electron microscopy, the resolution we achieved allowed us to resolve  
354 the precise 3D coat ultrastructure of clathrin-coated pits. Importantly, due to the molecular  
355 specificity for clathrin, we were able to segment all endocytic sites at the bottom surface of  
356 the cells in our images in an unbiased way, thus ensuring homogenous sampling of the  
357 structural variety of clathrin coats.

358 We applied a novel maximum-likelihood based fitting framework that we developed  
359 recently (Wu et al., 2021), which allows fitting complex geometric models to localization point  
360 clouds. Because the fit is applied directly to the localizations, it considers all quantitative  
361 parameters of all localizations, most notably localization uncertainty. This results in the  
362 precise and reliable quantification of the underlying structures (Wu, Tschanz & Krupnik et al.,  
363 2020), even when taking linkage error through indirect immunolabeling into account  
364 (Supplementary Figure 6).

365 We described the clathrin coat as a spherical cap, which matched the large majority of  
366 sites very well. Additionally, in our data, we observed that some sites are asymmetric,  
367 ellipsoidal, or deformed more irregularly (Supplementary Figure 1C). We do not currently  
368 evaluate this asymmetry. Rather, we introduced rotational symmetry during the averaging  
369 (Figure 4G), where we aligned each site based on their model parameters and thus averaged  
370 out many irregularities. A deviation of the cross-sectional profile from a circle is nevertheless  
371 preserved in the averaging (Supplementary Figure 8D - F), and in future studies more complex  
372 geometric models will enable analyzing the structure and asymmetries of the coat in more  
373 detail.

374

### 375 ***Flat clathrin-coated structures***

376 In the first step of our analysis pipeline, we segmented all clathrin-coated structures in  
377 the superresolution images. We thereby aimed to achieve homogenous sampling to capture  
378 all endocytic intermediates with the same probability irrespective of time point, size, and  
379 orientation. Interestingly, the surfaces of the earliest detectable endocytic sites already  
380 contained half the surface area of sites in the latest CME stages. How do these earliest sites  
381 assemble? We cannot sort the very flat sites, which are comparatively rare in our dataset, in  
382 time using  $\theta$  because their  $\theta$  is close to zero. However, their relative fraction among all sites  
383 is still informative. As short-lived states are under-represented, the relative absence of small  
384 flat sites in our data indicates that the initial assembly occurs rapidly.

385 In addition to the short lifetimes of small flat sites, two technical reasons could potentially  
386 contribute to their rare occurrence in our data. Due to their small size and potentially sub-  
387 stoichiometric labeling, which is also noticeable as holes in larger structures (Supplementary  
388 Figure 1D), they might not have sufficient immunostaining signal and thus they might be hard  
389 to be differentiated from small clusters of primary and secondary antibodies that are  
390 routinely observed in SMLM images. Additionally, the very first small clathrin assemblies  
391 might be meta-stable, with mostly loosely bound triskelia, and thus might not be stabilized  
392 well by chemical fixation. However, it is important to note that very small sites are also rarely  
393 found in previously published electron microscopy datasets (Avinoam et al., 2015; Bucher et  
394 al., 2018; Sochacki et al., 2021). Since EM should not suffer from the same technical  
395 limitations, it seems likely that these states are indeed short-lived.

396 Generally, completely flat clathrin coats are rare in our data. Instead, we observed that  
397 clathrin coats quickly acquire curvature already early in endocytosis. This agrees with the  
398 early observation made using EM (Heuser, 1980) that even flat structures already had some  
399 small degree of curvature. Interestingly, an enrichment of pentagons was observed towards  
400 the edges of flat lattices, leading to the hypothesis that even without additional formation of  
401 pentagons these flat lattices have the built-in capacity to become curved, and are not very  
402 stable. This notion is in agreement with recent demonstrations that flat clathrin coats store  
403 energy, which can drive coat bending without additional factors (Sochacki et al., 2021;  
404 Tagiltsev et al., 2021).

405 The importance of curvature generation for clathrin coat maturation is supported by  
406 previous studies that suggest failure to initiate significant curvature as a hallmark of abortive  
407 events (Loerke et al., 2009; Wang et al., 2020). Observed in live-cell studies, these dim and  
408 short-lived events fail to significantly increase in intensity and do not undergo scission (Loerke  
409 et al., 2009; Mettlen et al., 2009). As structures in our data set mostly contain at least shallow  
410 curvatures at minimally half the final coat area, we are likely not capturing these abortive  
411 events, and they have negligible impact on our analysis.

412



### 413 ***The cooperative curvature model***

414 Here, we visualized the shapes of clathrin coats with high 3D resolution. This was crucial  
415 to precisely measure the clathrin curvature throughout the endocytic timeline ranging from  
416 flat to highly curved structures. Especially shallow curvatures are hard to accurately assess  
417 with 2D imaging. Thus, our data enabled us to robustly test different growth models for  
418 clathrin during endocytosis.

419 The constant curvature model predicts a continuous increase in surface area, constant  
420 coat curvature, as well as a rim length that increases until a half spherical geometry is reached,  
421 and then decreases again. Our experimental data, most notably the increase in curvature and  
422 monotonical decrease in rim length, are incompatible with these predictions, thus ruling out  
423 the constant curvature model (Figure 3, green lines).

424 The constant area model, in a strict interpretation, on the other hand predicts the coat  
425 to assemble completely on a flat membrane, after which its area stays constant and only  
426 curvature increases to form a spherical vesicle. These predictions agree reasonably well with  
427 the data for curvature propagation during CME, but fail to explain the monotonic increase in  
428 coat surface over time. Thus, the continuous increase of surface area that we observed here  
429 rule out the constant area model as well (Figure 3, blue lines). Interestingly, earlier work  
430 compatible with the constant area model already suggested the presence of shallow  
431 curvatures in even the flattest clathrin coated structures (Avinoam et al., 2015; Bucher et al.,  
432 2018; Heuser, 1980)

433 We found that around half of the clathrin coat area has preassembled when plasma  
434 membrane invagination begins (Figure 2D, 4C), agreeing well with previous reports (Bucher  
435 et al., 2018; Scott et al., 2018), after which the coat keeps growing gradually. Based on this  
436 observation, we developed a mathematical model that for the first time considers that  
437 curvature is generated in a positive (non-linear) feedback loop. Our cooperative curvature  
438 model assumes that net area growth of the clathrin coat occurs via triskelia addition to the  
439 many available binding sites at the coat edge. We proposed that this process depends on the  
440 number of free binding sites, which scale with the rim length, and can be described by a single  
441 kinetic constant  $k_{\text{on}}$ . Triskelia addition within the coat is still likely to occur at a lower rate, as  
442 clathrin lattices can be unsaturated and have defects (Frey et al., 2020; Sochacki et al., 2021)  
443 and triskelia can exchange (Avinoam et al., 2015), which is energetically favorable for  
444 curvature changes within these lattices (Frey and Schwarz, 2020; Sochacki et al., 2021;  
445 Tagiltsev et al., 2021). While growth at the rim accounts for increase in surface area, curvature  
446 is most likely generated in the bulk of the coat. Here we assumed a non-linear relation  
447 between the rate of curvature increase and curvature, which reflects cooperativity in the  
448 lattice, e.g. due to rearrangements of neighboring triskelia or larger regions thereof. This  
449 assumption of cooperativity is supported by recent experiments, which suggest clathrin to  
450 exhibit curvature sensing properties, preferentially assembling at pre-bent membranes  
451 (Sochacki et al., 2021; Zeno et al., 2021). The model described above shows an excellent fit  
452 between theory and experiment, and further predicts a square root dependence of theta over

453 time. This describes curvature generation during clathrin coat maturation as a non-linear  
454 mechanism driven by a positive feedback of multiple triskelia, slowing down once the coat  
455 approaches a preferred degree of curvature.

456 Even though our model agrees very well with the data, it still exhibits certain limitations worth  
457 mentioning:

458 Firstly, it only considers the coat itself and ignores the plethora of other proteins within  
459 the endocytic machinery. These include numerous BAR domain proteins that are dynamically  
460 recruited and disassembled during endocytosis and thus are bound to influence membrane  
461 curvature at endocytic sites, as well as a variety of clathrin adaptor proteins, whose presence  
462 or absence could explain the cell-type specific differences in average vesicle sizes that we  
463 observed (Supplementary Figure 5). Taken together, these factors could explain the  
464 imperfection of our model in the very beginning, and the final part of the timeline (Figure 4A),  
465 where vesicle scission is driven by the fast-acting mechanoenzyme dynamin. Additionally, we  
466 only modeled clathrin recruitment and ignore clathrin disassembly, which could be mediated  
467 by adaptor unbinding (Taylor et al., 2011) and uncoating factors including auxilin (He et al.,  
468 2020) that are recruited before the end of vesicle scission. We also assumed that the clathrin  
469 coat has constant properties, most notably that the intrinsic coat-driven curvature generation  
470 towards its preferred curvature occurs unidirectionally and remains the same throughout  
471 endocytosis (equation 3). It is however likely that the properties of the clathrin coat change  
472 during endocytosis, e.g. by coat stiffening or increasingly tight interactions between triskelia  
473 (Frey and Schwarz, 2020; Frey et al., 2020; Sochacki et al., 2021).

474 Secondly, we reconstructed an average trajectory of clathrin coat remodeling, generated  
475 from many individual static snapshots, thereby averaging conceivable different pathways of  
476 CME. However, different pathways with substantially changed relationships between the  
477 parameters like curvature and theta would be visible in the corresponding plots as separate  
478 point clouds. This is not the case, rather we observed a continuous correlation between  
479 curvature and theta following a single trajectory, indicating that CME follows a single,  
480 stereotypic pathway. We did identify a small, disconnected population of sites in our data set  
481 that most likely originate from a distinct cellular mechanism (Supplementary Figure 3 and 4).  
482 While this indicates that our approach should capture potentially different pathways of  
483 clathrin coated vesicle formation, we cannot exclude that minor mechanistic variations are  
484 included into the average trajectory.

485 Clathrin recruitment has been quantified extensively using live-cell microscopy, resolving  
486 the sequential recruitment and dynamic characteristics of many important endocytic  
487 components (Aguet et al., 2013; Cocucci et al., 2012; Doyon et al., 2011; He et al., 2017; Jin  
488 et al., 2021; Loerke et al., 2009; Mettlen et al., 2009; Saffarian et al., 2009; Schöneberg et al.,  
489 2018; Taylor et al., 2011). We wondered if it is possible to correlate our pseudotime  
490 reconstruction with previously reported real-time dynamics of clathrin, which shows an initial  
491 fluorescence intensity increase, a plateau, and finally a sharp intensity decrease after vesicle  
492 scission. While we observed a correlation between the number of clathrin localizations and

493 surface area (Supplementary Figure 7), we note that indirect immunolabeling is not always  
494 quantitative, which complicates a direct comparison of previously reported live-cell  
495 fluorescence intensity over time and our pseudotime trajectory data. Nevertheless, we  
496 speculate that the initial fast intensity increase in live-cell studies likely corresponds to the  
497 initial growth of the flat clathrin coat that escapes our detection due to the fast dynamics and  
498 small size. The slower fluorescence increase and subsequent plateauing then coincides with  
499 curvature generation and final addition of triskelia at the coat rim as resolved in detail in our  
500 pseudotime data. To better understand the correlation between changes in the nanoscale  
501 architecture of clathrin coats and dynamic consequences, we would ultimately require a  
502 method that combines high structural with temporal resolution. In a recent publication, this  
503 was attempted using a live-cell 2D superresolution microscopy approach (Willy et al., 2021).  
504 This study reported an increasing projected area of clathrin over time, suggested that  
505 curvature is present in the earliest detectable clathrin structures, and concluded that CME  
506 follows the constant curvature model. Although we also find that completely flat structures  
507 are rare and curvature is initiated before the final surface is acquired, our data is entirely  
508 incompatible with the CCM. This is especially true in the first half of endocytosis with shallow  
509 but progressively increasing curvatures (Figure 3), which is challenging to measure using 2D  
510 imaging. This shows that it remains highly desirable to ultimately image the 3D nanoscale  
511 architecture of the clathrin coat in living cells in real time.

512 In summary, we characterized the dynamics and geometries of the clathrin coat in  
513 endocytosis by combining 3D superresolution microscopy, quantitative analysis, and  
514 mathematical modeling. We found that clathrin bending and assembly occur simultaneously  
515 along a precisely defined trajectory. We anticipate that this work will be foundational to  
516 further study the structural mechanism of endocytosis, both under physiological conditions,  
517 and in disease, where changes in CME likely occur very frequently and have just recently been  
518 shown to have profound functional consequences (Moulay et al., 2020; Xiao Guan-Yu et al.,  
519 2018).

520

521 **Acknowledgements**

522 We thank the entire Ries and Kaksonen labs for fruitful discussions and support. This work  
523 was supported by the European Research Council (ERC CoG-724489 to J.R.), the National  
524 Institutes of Health Common Fund 4D Nucleome Program (Grant U01 to J.R.), the Human  
525 Frontier Science Program (RGY0065/2017 to J.R.), the EMBL Interdisciplinary Postdoc  
526 Programme (EIPOD) under Marie Curie Actions COFUND (Grant 229597 to O.A.), the  
527 European Molecular Biology Laboratory (M.M., A.T., Y.-L. W. and J.R.) and the Swiss National  
528 Science Foundation (grant 310030B\_182825 and NCCR Chemical Biology to MK). O.A is an  
529 incumbent of the Miriam Berman Presidential Development Chair.

530 **Author contributions**

531 M.M., O.A., M.K. and J.R. conceived the study, M.M., A.T., J.M. and O.A. performed  
532 experiments, M.M., A.T., Y.-L.W., J.M., O.A. and J.R. analyzed superresolution data; F.F. and  
533 U.S. developed the cooperative curvature model; J.R. supervised the study. M.M., A.T., F.F.,  
534 J.R. wrote the manuscript with input from all authors.

535 **Declaration of interests**

536 The authors declare no competing interests.

## 537 **Material and methods**

### 538 ***Cell culture***

539 SK-MEL-2 cells (gift from David Drubin, UC Berkeley, described in (Doyon et al., 2011))  
540 were cultured adherently as described previously (Li et al., 2018) in DMEM F12 (Dulbecco's  
541 modified Eagle's medium with Nutrient Mixture F-12) with GlutaMAX, phenol red (Thermo  
542 Fisher; 10565018), 10% (v/v) FBS, ZellShield (Biochrom AG, Berlin, Germany), at 37 °C, under  
543 an atmosphere with 5% CO<sub>2</sub> and 100% humidity.

544 U2OS cells (Cell Line Services; #300174) were cultured adherently as described previously  
545 (Thevathasan et al., 2019) in high-glucose DMEM supplemented with 10% FBS, 2 mM l-  
546 glutamine, non-essential amino acids, ZellShield at 37 °C under an atmosphere with 5% CO<sub>2</sub>  
547 and 100% humidity.

548 3T3 mouse fibroblasts (gift from Alba Diz-Muñoz, EMBL Heidelberg) were cultured  
549 adherently in DMEM (4.5 g/L D-Glucose) supplemented with 1× MEM NEAA (catalog no.  
550 11140-035, Gibco), 1× GlutaMAX (catalog no. 35050-038, Gibco) and 10% (v/v) fetal bovine  
551 serum (catalog no. 10270-106, Gibco) at 37°C under an atmosphere with 5% CO<sub>2</sub>, 100%  
552 humidity.

### 553 ***Sample preparation for superresolution imaging of clathrin-coated pits***

554 Cells were fixed as described previously (Li et al., 2018) using 3% (w/v) formaldehyde 10  
555 mM MES, pH 6.1, 150 mM NaCl, 5 mM EGTA, 5 mM d-glucose, 5 mM MgCl<sub>2</sub> for 20 min.  
556 Fixation was quenched in 0.1% (w/v) NaBH<sub>4</sub> for 7 min. The sample was washed three times  
557 with PBS and permeabilized for 15 min with 0.01% (w/v) digitonin (Sigma-Aldrich, St. Louis,  
558 MO, USA) in PBS. The sample was then washed twice with PBS and blocked for 1h with 2%  
559 (w/v) BSA/PBS, washed with PBS, and stained for 3–12 h with anti-clathrin light chain (sc-  
560 28276; Santa Cruz Biotechnology, Dallas, TX, USA) and anti-clathrin heavy chain rabbit  
561 polyclonal antibodies (ab21679; Abcam, Cambridge, UK) in 1% (w/v) BSA/PBS. After three  
562 washes with PBS the sample was incubated for 3-4h with a secondary donkey anti-rabbit  
563 antibody (711-005-152; Jackson ImmunoResearch, West Grove, PA, USA) that was conjugated  
564 to Alexa Fluor 647–NHS at an average degree of labeling of 1.5. The sample was then washed  
565 three times and mounted for imaging in blinking buffer (50 mM Tris/HCl pH 8, 10 mM NaCl,  
566 10% (w/v) D-glucose, 500 µg ml<sup>-1</sup> glucose oxidase, 40 µg ml<sup>-1</sup> glucose catalase, 35 mM MEA in  
567 H<sub>2</sub>O).

568 For the analysis of the disconnected population of sites, 3T3 cells were transfected with  
569 a plasmid encoding the sigma 2 subunit, fused to GFP (a kind gift from Steeve Boulant,  
570 University of Florida), to obtain cells transiently expressing AP2-GFP. The transfection was  
571 performed using a Lipofectamine™ 2000 reagent (Life Technologies) according to the  
572 manufacturer's recommendations: 1 µg DNA was mixed with 50 µL OptiMEM I  
573 (ThermoFisher). The same was done for 3 µL Lipofectamin in 50 µL OptiMEM I. Both solutions  
574 were incubated for 5 min and then mixed together and incubated for additional 10 min, at

575 room temperature. The media of previously seeded cells was exchanged to pre-warmed  
576 OptiMEM I, to which the DNA-Lipofectamin solution (100  $\mu$ L) was dropwise added. After  
577 approximately 24 hours of incubation (at 5% CO<sub>2</sub>, 37 °C), the medium was exchanged with  
578 fresh growth medium. After additional incubation for approximately 16 hours, cells were fixed  
579 according to the same protocol described above.

### 580 ***Superresolution microscopy***

581 SMLM images were acquired at room temperature (24 °C) on a customized microscope  
582 (Mund et al., 2018) with a 160x NA 1.43 oil-immersion objective (Leica, Wetzlar, Germany).  
583 Illumination was done using a a LightHub laser combiner (Omicron-Laserage Laserprodukte,  
584 Dudenhofen, Germany) with Luxx 405, 488, and 638 Cobolt 561 lasers, which were triggered  
585 using a Mojo FPGA (Embedded Micro, Denver, CO, USA) for microsecond pulsing control of  
586 lasers. The lasers were guided through a speckle reducer (LSR-3005-17S-VIS; Optotune,  
587 Dietikon, Switzerland) and coupled into a multimode fiber (M105L02S-A; Thorlabs, Newton,  
588 NJ, USA). The output of the fiber is magnified and imaged into the sample. Fiber generated  
589 fluorescence was removed using a laser clean-up filter (390/482/563/640 HC Quad; AHF,  
590 Tübingen, Germany). The focus was stabilized using a closed-loop system, based on reflecting  
591 the signal of a near-infrared laser by the coverslip and detecting the resulting signal on a  
592 quadrant photodiode, resulting in focus stabilities of  $\pm 10$  nm over several hours. Fluorescence  
593 emission was filtered using a 676/37 or a 700/100 bandpass filter (AHF) and recorded by an  
594 EMCCD camera (Evolve512D; Photometrics, Tucson, AZ, USA). Typically, 100,000–300,000  
595 frames were acquired using 15-ms or 30 ms exposure times and laser power densities of  $\sim 15$   
596 kW/cm<sup>2</sup>. 405-nm laser intensity was adjusted automatically by changing pulse duration in  
597 order to keep the number of localizations per frame constant during the acquisition.

598 For the analysis of the disconnected population of sites, one diffraction limited image was  
599 additionally acquired before SMLM imaging. For this, a 488 laser at 1.4 kW/cm<sup>2</sup> was used to  
600 take a single frame at 30 ms exposure time. Emission was filtered using a 525/50 bandpass  
601 filter (AHF).

### 602 ***Data analysis***

603 All data analysis was conducted in SMAP ((Ries, 2020) based on MATLAB and available as  
604 open source under [github.com/jries/SMAP](https://github.com/jries/SMAP)).

### 605 ***Superresolution image reconstruction***

606 For fitting the localizations, peaks were detected as maxima in raw camera images after  
607 applying a difference-of-Gaussian filter. At those positions, cropped images of 13x13 pixels  
608 were fitted with an experimentally derived PSF model (free fitting parameters:  $x$ ,  $y$ ,  $z$ , photons  
609 per localization, background per pixel), using an MLE (Maximum likelihood estimation) fitter  
610 (Li et al., 2018). The  $x$ ,  $y$  and  $z$  positions were corrected for residual drift by a custom algorithm  
611 based on redundant cross-correlation. In short, the data was distributed into 10 time bins of  
612 equal length. For each bin a superresolution image was reconstructed. We then calculated



613 the image cross-correlations among all superresolution images and extracted the relative  
614 displacements in x and y were from the position of the maximum in the cross-correlation  
615 images. We then calculated the drift trajectory that best describes the relative displacements.  
616 In a second step, the z-drift was measured in an analogous way, using intensity profiles in z  
617 instead of images. Localizations persistent over consecutive frames (detected within 35 nm  
618 from one another and with a maximum gap of one dark frame) were merged into one  
619 localization by calculating the weighted average of x, y and z positions and the sums of  
620 photons per localization and background. Localizations were filtered by the localization  
621 precision in x,y (0–20 nm) and z (0–30 nm) to exclude dim localizations. The modal value for  
622 the localization precision  $\sigma$  was 3.9 nm in x/y and 12.5 nm in z, leading to a resolution  
623 estimate (calculated using the Full Width Half Maximum (FWHM) using  $\text{FWHM} = 2\sqrt{(2\ln 2)\sigma}$ )  
624 of 9.2 nm in x/y and 29.4 nm in z (typical values based on representative image).  
625 Superresolution images were constructed with every localization rendered as a two-  
626 dimensional spherical Gaussian with a width of 3 nm. The red hot color map used represents  
627 the density of localizations, and is scaled in a way that 0.03% of the pixel values are saturated.

## 628 *Quantitative geometric analysis of clathrin-coated structures*

629 Clathrin-coated structures were segmented semi-automatically. First, we manually  
630 defined a region of interest excluding the edges of the cell. Then, the image was blurred using  
631 a Gaussian filter with a sigma of 100 nm, and peaks were detected using a manually set  
632 threshold. This typically yielded several hundreds of sites in a region of 30x30  $\mu\text{m}$ . These  
633 candidate sites were curated manually, and only single, well-isolated clathrin-coated  
634 structures were retained in the dataset.

635 Next, these structures were analyzed using LocMoFit, an MLE-based model fitting  
636 framework that we developed recently (Wu et al., 2021). LocMoFit directly fits localization  
637 coordinates with the probability density function (PDF) of a parametrized geometric model.  
638 In this study, we modeled clathrin-coated structures with a hollow spherical cap  
639 parameterized by the surface area  $A$  and the closing angle  $\theta$ .  $\theta$  is defined as the angle  
640 between the two vectors that point to the pole and to the rim, respectively, from the center  
641 of the sphere. The position of the model is defined as the center of mass of the cap. In  
642 practice, we discretized the cap by placing spiral points (Saff and Kuijlaars, 1997), or the  
643 spherical Fibonacci lattice, on the surface of the cap to approximate an even distribution. In  
644 LocMoFit, these points were treated as discrete fluorophore coordinates when constructing  
645 the PDF of the model. During fitting, additional parameters including the center position and  
646 the orientation of the model were determined with respect to the fluorophore coordinates,  
647 and an extra uncertainty and the background weight were applied to the PDF. After fitting,  
648 the sphere radius is derived as  $r = \sqrt{A/2\pi(1 - \cos \theta)}$ , projected area as  $A_p = \pi \sin^2 \theta$  and  
649 edge length as  $\varepsilon = 2\pi \sin \theta$ . For some flat sites where the fit produced slightly negative  
650 curvature values, curvature  $H$  and  $\theta$  were set to 0  $\text{nm}^{-1}$  and 0° respectively in order to  
651 approximate them as completely flat.

652 After model fitting, a second curation step was performed. With this we ensured that only  
653 well fitted sites are included in the final data set. Sites were excluded if they were upside  
654 down (clearly originating from an upper membrane), double-sites with two sites clearly  
655 connected to each other or an adjacent flat structure, large plaques or structures non-  
656 distinguishable from an antibody cluster.

#### 657 *Pseudo-temporal reconstruction of clathrin remodeling during endocytosis*

658 To sort endocytic sites in pseudotime, they were sorted by the closing angle  $\theta$ , assigning  
659 each site a rank index. Flat sites with a manually assigned  $H = 0 \text{ nm}^{-1}$  and  $\theta = 0$  were all  
660 assigned an index of 0. As pseudo-temporal sorting assumes that all sites are part of the same  
661 endocytic trajectory, endocytic sites with curvatures above a cell line specific threshold ( $H >$   
662  $0.016 \text{ nm}^{-1}$  for SK-MEL-2;  $H > 0.013 \text{ nm}^{-1}$  for U2OS;  $H > 0.014 \text{ nm}^{-1}$  for 3T3) that form a visibly  
663 disconnected point cloud (Supplementary Figures 3 and 4) were excluded for this analysis  
664 (Supplementary Figure 5). To compute pseudo-temporal averages, the sites were spatially  
665 and rotationally aligned, and rescaled by the average radius of all sites within the respective  
666 bin. Because the geometric model is rotationally symmetric, we then performed rotational  
667 averaging by generating 72 duplicates of each structure, rotating them by 5 degrees with  
668 respect to each other, and averaging them. The supplementary movie was computed using a  
669 sliding window approach, where each frame shows the average of 30 sites, and the frame-to-  
670 frame increment is 20 sites. The median pseudotime of those 30 sites is indicated.

#### 671 *Further data analysis*

672 All data that resulted from the quantitative geometric description of clathrin-coated  
673 structures were further analyzed in R (R Core Team, 2020). Fitting of the growth models  
674 (Tables 1-3) was performed on a filtered data set, excluding disconnected sites above a cell  
675 line specific threshold, and sites of negative curvature. During fitting, for sites with  $\theta = 0^\circ$  we  
676 set  $\theta = 0.0001^\circ$  to avoid division by 0.

677 For depicting the growth models in Figure 3 and 4, as well as Supplementary Figure 5,  
678 parameters resulting from the  $H(\theta)$  fit were used and mapped to the  $A$ ,  $\varepsilon$  and  $A_p$  data.

#### 679 *Simulations*

680 Simulations were performed using the simulation engine for SMLM data implemented in  
681 SMAP and LocMoFit as described in (Thevathasan et al., 2019). The realistic simulations were  
682 based on a two-state (bright and dark) fluorophore model plus bleaching (Sage et al., 2019)  
683 and parameters (number of photons, background photons, and fluorophore on-time  $t_l$ )  
684 extracted from our experiment. (1) First, we defined an equally distributed closing angle  $\theta$   
685 from  $0$  to  $180^\circ$  and calculated the surface area  $A(\theta) = 2\pi(1 - \cos\theta)/H(\theta)^2$  (see  
686 Supplementary Note for details). Here  $H(\theta)$  is defined as in Equation 3, with fitting  
687 parameters determined in SK-MEL-2 (see Table 1). (2) With the defined model parameters,  
688 we generated protein positions for each simulated structure by taking randomly drawn  $N \propto$   
689  $A$  samples from the PDF of the hollow spherical cap with no uncertainty. (3) With a probability

690  $p_{\text{label}} = 0.6$ , a fluorescent label was created at a protein position. (4) Linkage displacements  
691 in  $x$ ,  $y$  and  $z$  were added to a label and were determined as normally distributed random  
692 variables with a variance corresponding to the linkage error of 5 nm. The fluorophore is  
693 assumed to be freely rotating three-dimensionally between different blinks. (5) Each  
694 fluorophore appeared at a random time and lived for a time  $t_l$ , determined as a random  
695 variable from an exponential distribution with a mean of 1.6 frames. (6) A label had a  
696 probability  $p_{\text{react}} = .5$  to be reactivated and then appeared at a random later time point,  
697 otherwise it was bleached. (7) When it was on, a fluorophore had a constant brightness. Thus,  
698 the brightness in each frame was proportional to the fraction of the time the fluorophore was  
699 on in each frame. (8) The emitted photons in each frame were determined as a random  
700 Poisson variable with a mean value corresponding to the average brightness in the frame. (9)  
701 For each frame, we calculated the CRLB (Cramér-Rao lower bound) in  $x$ ,  $y$  and  $z$  from the  
702 number of photons (with a mean of 11,000) and the background photons (130 per pixel)  
703 based on the theoretical Gaussian PSF (Mortensen et al., 2010) or a 3D cspline PSF model  
704 derived from beads calibrations (Li et al., 2018). This error was added to the true  $x$ ,  $y$  and  $z$   
705 positions of the fluorophores as normally distributed random values with a variance  
706 corresponding to the respective calculated CRLB.

## 707 References

- 708 Aguet, F., Antonescu, C.N., Mettlen, M., Schmid, S.L., and Danuser, G. (2013). Advances in Analysis of Low  
709 Signal-to-Noise Images Link Dynamin and AP2 to the Functions of an Endocytic Checkpoint. *Developmental Cell*  
710 *26*, 279–291. <https://doi.org/10/f46wpj>.
- 711 Avinoam, O., Schorb, M., Beese, C.J., Briggs, J.A.G., and Kaksonen, M. (2015). Endocytic sites mature by  
712 continuous bending and remodeling of the clathrin coat. *Science* *348*, 1369–1372. <https://doi.org/10/5ht>.
- 713 Bucher, D., Frey, F., Sochacki, K.A., Kummer, S., Bergeest, J.-P., Godinez, W.J., Kräusslich, H.-G., Rohr, K.,  
714 Taraska, J.W., Schwarz, U.S., et al. (2018). Clathrin-adaptor ratio and membrane tension regulate the flat-to-  
715 curved transition of the clathrin coat during endocytosis. *Nature Communications* *9*, 1109.  
716 <https://doi.org/10/gc7xcf>.
- 717 Chen, Z., and Schmid, S.L. (2020). Evolving models for assembling and shaping clathrin-coated pits. *Journal*  
718 *of Cell Biology* *219*. <https://doi.org/10/gg8skb>.
- 719 Cheng, Y., Boll, W., Kirchhausen, T., Harrison, S.C., and Walz, T. (2007). Cryo-electron Tomography of  
720 Clathrin-coated Vesicles: Structural Implications for Coat Assembly. *Journal of Molecular Biology* *365*, 892–899.  
721 <https://doi.org/10/fmtf9k>.
- 722 Cocucci, E., Aguet, F., Boulant, S., and Kirchhausen, T. (2012). The first five seconds in the life of a clathrin-  
723 coated pit. *Cell* *150*, 495–507. <https://doi.org/10/f368g7>.
- 724 Dannhauser, P.N., and Ungewickell, E.J. (2012). Reconstitution of clathrin-coated bud and vesicle formation  
725 with minimal components. *Nature Cell Biology* *14*, 634. .
- 726 Doyon, J.B., Zeitler, B., Cheng, J., Cheng, A.T., Cherone, J.M., Santiago, Y., Lee, A.H., Vo, T.D., Doyon, Y.,  
727 Miller, J.C., et al. (2011). Rapid and efficient clathrin-mediated endocytosis revealed in genome-edited  
728 mammalian cells. *Nature Cell Biology* *13*, 331–337. <https://doi.org/10/dwm6qz>.
- 729 Fotin, A., Cheng, Y., Sliz, P., Grigorieff, N., Harrison, S.C., Kirchhausen, T., and Walz, T. (2004). Molecular  
730 model for a complete clathrin lattice from electron cryomicroscopy. *Nature* *432*, 573–579.  
731 <https://doi.org/10/cvpxj7>.
- 732 Frey, F., and Schwarz, U.S. (2020). Competing pathways for the invagination of clathrin-coated membranes.  
733 *Soft Matter* <https://doi.org/10/ghg34t>.
- 734 Frey, F., Bucher, D., Sochacki, K.A., Taraska, J.W., Boulant, S., and Schwarz, U.S. (2020). Eden growth models  
735 for flat clathrin lattices with vacancies. *New Journal of Physics* *22*, 073043. <https://doi.org/10/gg57vs>.
- 736 Früh, S.M., Matti, U., Spycher, P.R., Rubini, M., Lickert, S., Schlichthaerle, T., Jungmann, R., Vogel, V., Ries,  
737 J., and Schoen, I. (2021). Site-Specifically-Labeled Antibodies for Super-Resolution Microscopy Reveal In Situ  
738 Linkage Errors. *ACS Nano* *15*, 12161–12170. <https://doi.org/10/gm596c>.
- 739 He, K., Marsland III, R., Upadhyayula, S., Song, E., Dang, S., Capraro, B.R., Wang, W., Skillern, W., Gaudin,  
740 R., Ma, M., et al. (2017). Dynamics of phosphoinositide conversion in clathrin-mediated endocytic traffic. *Nature*  
741 *552*, 410–414. <https://doi.org/10/gcn7bs>.
- 742 He, K., Song, E., Upadhyayula, S., Dang, S., Gaudin, R., Skillern, W., Bu, K., Capraro, B.R., Rapoport, I., Kusters,  
743 I., et al. (2020). Dynamics of Auxilin 1 and GAK in clathrin-mediated traffic. *Journal of Cell Biology* *219*.  
744 <https://doi.org/10/ggm865>.
- 745 Henne, W.M., Boucrot, E., Meinecke, M., Evergren, E., Vallis, Y., Mittal, R., and McMahon, H.T. (2010). FCHO  
746 Proteins Are Nucleators of Clathrin-Mediated Endocytosis. *Science* *328*, 1281–1284. <https://doi.org/10/cbq32n>.
- 747 Heuser, J. (1980). Three-dimensional visualization of coated vesicle formation in fibroblasts. *Journal of Cell*  
748 *Biology* *84*, 560–583. <https://doi.org/10/cqc9rp>.
- 749 Heuser, J., and Kirchhausen, T. (1985). Deep-etch views of clathrin assemblies. *Journal of Ultrastructure*  
750 *Research* *92*, 1–27. <https://doi.org/10/ccdws8>.

- 751 Jin, M., Shirazinejad, C., Wang, B., Yan, A., Schöneberg, J., Upadhyayula, S., Xu, K., and Drubin, D.G. (2021).  
752 Asymmetric Arp2/3-mediated actin assembly facilitates clathrin-mediated endocytosis at stalled sites in  
753 genome-edited human stem cells. *BioRxiv* 2021.07.16.452693. <https://doi.org/10/gmkwr8>.
- 754 Kaksonen, M., and Roux, A. (2018). Mechanisms of clathrin-mediated endocytosis. *Nature Reviews*  
755 *Molecular Cell Biology* 19, 313. .
- 756 Kanaseki, T., and Kadota, K. (1969). THE “VESICLE IN A BASKET” : A Morphological Study of the Coated  
757 Vesicle Isolated from the Nerve Endings of the Guinea Pig Brain, with Special Reference to the Mechanism of  
758 Membrane Movements. *Journal of Cell Biology* 42, 202–220. <https://doi.org/10.1083/jcb.42.1.202>.
- 759 Kaplan, C., Kenny, S.J., Chen, S., Schöneberg, J., Sitariska, E., Diz-Muñoz, A., Xu, K., and Drubin, D.G. (2020).  
760 Adaptive actin organization counteracts elevated membrane tension to ensure robust endocytosis. *BioRxiv*  
761 2020.04.05.026559. <https://doi.org/10/ggznqs>.
- 762 Kirchhausen, T. (1993). Coated pits and coated vesicles — sorting it all out. *Current Opinion in Structural*  
763 *Biology* 3, 182–188. <https://doi.org/10/c9w4z9>.
- 764 Li, Y., Mund, M., Hoess, P., Deschamps, J., Matti, U., Nijmeijer, B., Sabinina, V.J., Ellenberg, J., Schoen, I.,  
765 and Ries, J. (2018). Real-time 3D single-molecule localization using experimental point spread functions. *Nature*  
766 *Methods* 15, 367–369. <https://doi.org/10/gfb8s8>.
- 767 Loerke, D., Mettlen, M., Yazar, D., Jaqaman, K., Jaqaman, H., Danuser, G., and Schmid, S.L. (2009). Cargo  
768 and dynamin regulate clathrin-coated pit maturation. *PLoS Biology* 7, e57. <https://doi.org/10/bn6ncp>.
- 769 Mettlen, M., Stoeber, M., Loerke, D., Antonescu, C.N., Danuser, G., and Schmid, S.L. (2009). Endocytic  
770 Accessory Proteins Are Functionally Distinguished by Their Differential Effects on the Maturation of Clathrin-  
771 coated Pits. *MBoC* 20, 3251–3260. <https://doi.org/10/frg4x8>.
- 772 Morris, K.L., Jones, J.R., Halebian, M., Wu, S., Baker, M., Armache, J.-P., Avila Ibarra, A., Sessions, R.B.,  
773 Cameron, A.D., Cheng, Y., et al. (2019). Cryo-EM of multiple cage architectures reveals a universal mode of  
774 clathrin self-assembly. *Nature Structural & Molecular Biology* 26, 890–898. <https://doi.org/10/gf9t8d>.
- 775 Mortensen, K.I., Churchman, L.S., Spudich, J.A., and Flyvbjerg, H. (2010). Optimized localization analysis for  
776 single-molecule tracking and super-resolution microscopy. *Nature Methods* 7, 377–381.  
777 <https://doi.org/10.1038/nmeth.1447>.
- 778 Moulay, G., Lainé, J., Lemaître, M., Nakamori, M., Nishino, I., Caillol, G., Mamchaoui, K., Julien, L., Dingli, F.,  
779 Loew, D., et al. (2020). Alternative splicing of clathrin heavy chain contributes to the switch from coated pits to  
780 plaques. *Journal of Cell Biology* 219. <https://doi.org/10/gjppd3>.
- 781 Mund, M., and Ries, J. (2020). How good are my data? Reference standards in superresolution microscopy.  
782 *MBoC* 31, 2093–2096. <https://doi.org/10/gg9fqp>.
- 783 Mund, M., van der Beek, J.A., Deschamps, J., Dmitrieff, S., Hoess, P., Monster, J.L., Picco, A., Nédélec, F.,  
784 Kaksonen, M., and Ries, J. (2018). Systematic Nanoscale Analysis of Endocytosis Links Efficient Vesicle Formation  
785 to Patterned Actin Nucleation. *Cell* 174, 884–896.e17. <https://doi.org/10/gdvp7h>.
- 786 Pearse, B.M. (1976). Clathrin: a unique protein associated with intracellular transfer of membrane by  
787 coated vesicles. *Proc Natl Acad Sci USA* 73, 1255. <https://doi.org/10/bwxz4p>.
- 788 R Core Team (2020). R: A Language and Environment for Statistical Computing (Vienna, Austria: R  
789 Foundation for Statistical Computing).
- 790 Ries, J. (2020). SMAP: a modular super-resolution microscopy analysis platform for SMLM data. *Nature*  
791 *Methods* 17, 870–872. <https://doi.org/10/gg9hvx>.
- 792 Saff, E.B., and Kuijlaars, A.B.J. (1997). Distributing many points on a sphere. *The Mathematical Intelligencer*  
793 19, 5–11. <https://doi.org/10/bc98s2>.
- 794 Saffarian, S., Cocucci, E., and Kirchhausen, T. (2009). Distinct dynamics of endocytic clathrin-coated pits and  
795 coated plaques. *PLoS Biology* 7, e1000191. <https://doi.org/10/bdt4bk>.

- 796 Sage, D., Pham, T.-A., Babcock, H., Lukes, T., Pengo, T., Chao, J., Velmurugan, R., Herbert, A., Agrawal, A.,  
797 Colabrese, S., et al. (2019). Super-resolution fight club: assessment of 2D and 3D single-molecule localization  
798 microscopy software. *Nature Methods* *16*, 387–395. <https://doi.org/10/gfx6nr>.
- 799 Schöneberg, J., Dambournet, D., Liu, T.-L., Forster, R., Hockemeyer, D., Betzig, E., and Drubin, D.G. (2018).  
800 4D cell biology: big data image analytics and lattice light-sheet imaging reveal dynamics of clathrin-mediated  
801 endocytosis in stem cell derived intestinal organoids. *Molecular Biology of the Cell* mbc.E18-06-0375.  
802 <https://doi.org/10/gd7q3g>.
- 803 Scott, B.L., Sochacki, K.A., Low-Nam, S.T., Bailey, E.M., Luu, Q., Hor, A., Dickey, A.M., Smith, S., Kerkvliet,  
804 J.G., Taraska, J.W., et al. (2018). Membrane bending occurs at all stages of clathrin-coat assembly and defines  
805 endocytic dynamics. *Nature Communications* *9*, 419. <https://doi.org/10/gcxq4s>.
- 806 Smith, C.J., Grigorieff, N., and Pearse, B.M.F. (1998). Clathrin coats at 21 Å resolution: a cellular assembly  
807 designed to recycle multiple membrane receptors. *The EMBO Journal* *17*, 4943–4953.  
808 <https://doi.org/10/d9zk4w>.
- 809 Sochacki, K.A., and Taraska, J.W. (2018). From Flat to Curved Clathrin : Controlling a Plastic Ratchet. *Trends*  
810 *in Cell Biology* 1–16. <https://doi.org/10/gf2n83>.
- 811 Sochacki, K.A., Dickey, A.M., Strub, M.-P., and Taraska, J.W. (2017). Endocytic proteins are partitioned at  
812 the edge of the clathrin lattice in mammalian cells. *Nature Cell Biology* *12*, 517. .
- 813 Sochacki, K.A., Heine, B.L., Haber, G.J., Jimah, J.R., Prasai, B., Alfonzo-Méndez, M.A., Roberts, A.D.,  
814 Somasundaram, A., Hinshaw, J.E., and Taraska, J.W. (2021). The structure and spontaneous curvature of clathrin  
815 lattices at the plasma membrane. *Developmental Cell* *56*, 1131-1146.e3. <https://doi.org/10/gjzwfd>.
- 816 Tagiltsev, G., Haselwandter, C.A., and Scheuring, S. (2021). Nanodissected elastically loaded clathrin lattices  
817 relax to increased curvature. *Sci Adv* *7*, eabg9934. <https://doi.org/10/gmnphh>.
- 818 Takei, K., Haucke, V., Slepnev, V., Farsad, K., Salazar, M., Chen, H., and De Camilli, P. (1998). Generation of  
819 Coated Intermediates of Clathrin-Mediated Endocytosis on Protein-Free Liposomes. *Cell* *94*, 131–141.  
820 <https://doi.org/10/bnwc7g>.
- 821 Taylor, M.J., Perrais, D., and Merrifield, C.J. (2011). A high precision survey of the molecular dynamics of  
822 mammalian clathrin-mediated endocytosis. *PLoS Biology* *9*, e1000604. <https://doi.org/10/cd8kkc>.
- 823 Thevathasan, J.V., Kahnwald, M., Cieśliński, K., Hoess, P., Peneti, S.K., Reitberger, M., Heid, D., Kasuba, K.C.,  
824 Hoerner, S.J., Li, Y., et al. (2019). Nuclear pores as versatile reference standards for quantitative superresolution  
825 microscopy. *Nature Methods* *16*, 1045–1053. <https://doi.org/10/gf85h3>.
- 826 Ungewickell, E., and Branton, D. (1981). Assembly units of clathrin coats. *Nature* *289*, 420–422.  
827 <https://doi.org/10/bqf2q3>.
- 828 Wang, X., Chen, Z., Mettlen, M., Noh, J., Schmid, S.L., and Danuser, G. (2020). DASC, a sensitive classifier for  
829 measuring discrete early stages in clathrin-mediated endocytosis. *ELife* *9*, e53686.  
830 <https://doi.org/10.7554/eLife.53686>.
- 831 Willy, N.M., Ferguson, J.P., Akatay, A., Huber, S., Djakbarova, U., Silahli, S., Cakez, C., Hasan, F., Chang, H.C.,  
832 Travasset, A., et al. (2021). De novo endocytic clathrin coats develop curvature at early stages of their formation.  
833 *Developmental Cell* <https://doi.org/10/gnhcr3>.
- 834 Wu, Y.-L., Tschanz, A., Krupnik, L., and Ries, J. (2020). Quantitative Data Analysis in Single-Molecule  
835 Localization Microscopy. *Trends in Cell Biology* *30*, 837–851. <https://doi.org/10/gmbvk8>.
- 836 Wu, Y.-L., Hoess, P., Tschanz, A., Matti, U., Mund, M., and Ries, J. (2021). Maximum-likelihood model fitting  
837 for quantitative analysis of SMLM data. *BioRxiv* 2021.08.30.456756. <https://doi.org/10/gmnvq7>.
- 838 Xiao Guan-Yu, Mohanakrishnan Aparna, and Schmid Sandra L. (2018). Role for ERK1/2-dependent  
839 activation of FCHSD2 in cancer cell-selective regulation of clathrin-mediated endocytosis. *Proceedings of the*  
840 *National Academy of Sciences* *115*, E9570–E9579. <https://doi.org/10.1073/pnas.1810209115>.



- 841 Yoshida, A., Sakai, N., Uekusa, Y., Imaoka, Y., Itagaki, Y., Suzuki, Y., and Yoshimura, S.H. (2018).  
842 Morphological changes of plasma membrane and protein assembly during clathrin-mediated endocytosis. *PLOS*  
843 *Biology* 16, e2004786. <https://doi.org/10/gdhq7k>.
- 844 Zeno, W.F., Hochfelder, J.B., Thatte, A.S., Wang, L., Gadok, A.K., Hayden, C.C., Lafer, E.M., and Stachowiak,  
845 J.C. (2021). Clathrin senses membrane curvature. *Biophysical Journal* 120, 818–828. <https://doi.org/10/gj9x2f>.
- 846 Zhao, W., Hanson, L., Lou, H.-Y., Akamatsu, M., Chowdary, P.D., Santoro, F., Marks, J.R., Grassart, A., Drubin,  
847 D.G., Cui, Y., et al. (2017). Nanoscale manipulation of membrane curvature for probing endocytosis in live cells.  
848 *Nature Nanotechnology* 11, 822. .
- 849

850 **Supplementary Information**

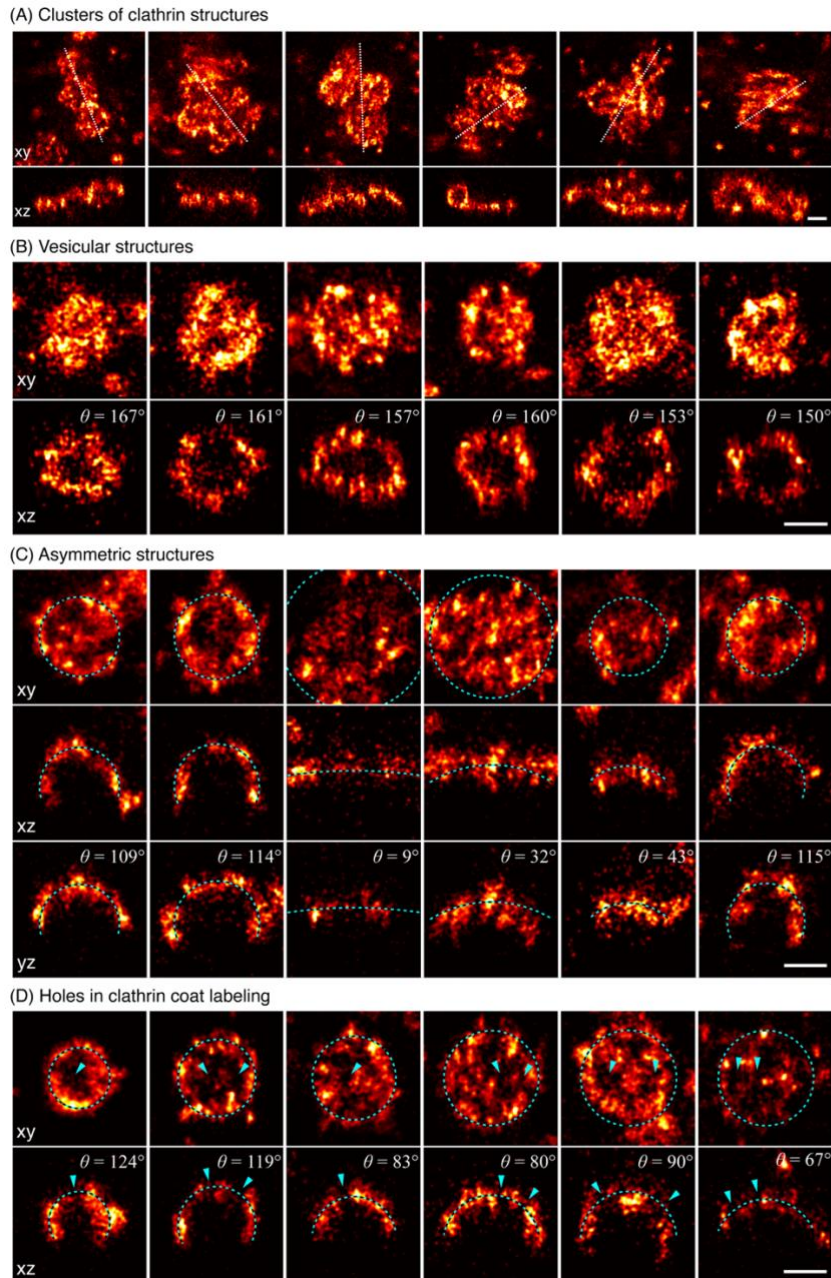

851

852 **Supplementary Figure 1 – Examples of diverse clathrin coat structures.** (A) Large clusters of clathrin molecules  
853 excluded from further analysis. Shown in top view (xy) with dotted line indicating a 50 nm-thick z-slice (xz) shown  
854 below. (B) Vesicular structures are sometimes fitted with a lower  $\theta$  as expected. (C) While a spherical model  
855 describes structure of most endocytic clathrin coats faithfully, there are few cases, as exemplified here, where  
856 the elliptical and irregular shape of an assembling coat is difficult to approximate with a simple geometric model.  
857 Two orthogonal 50 nm-thick z-slices are shown here in xz and yz, and the respective spherical model fit is plotted  
858 as a dotted line. (D) Non-continuous labeling of clathrin manifests itself as holes in the coat, indicated with a blue  
859 arrow. All scale bars are 100 nm.

860

861

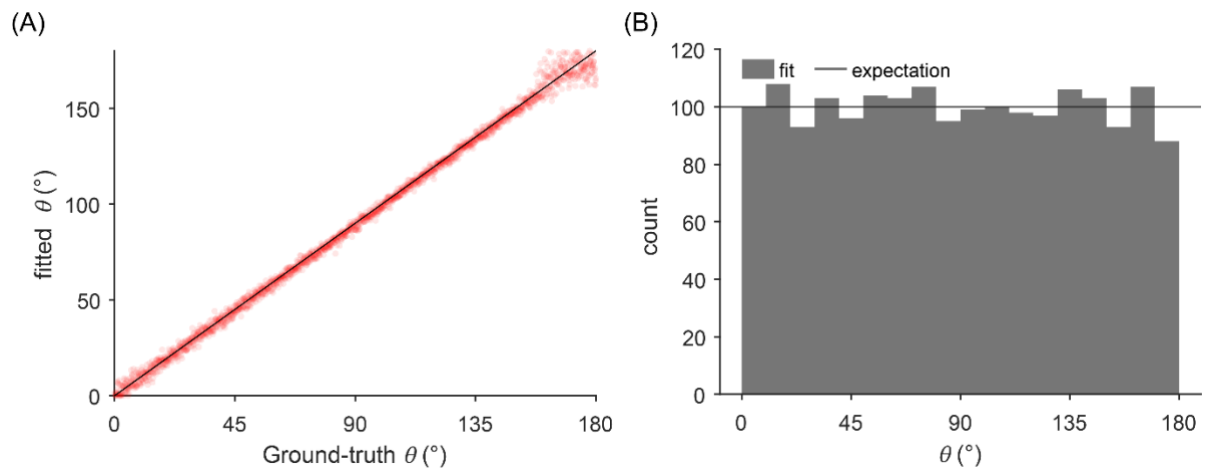

862

863 **Supplementary Figure 2 – Estimation error of the closing angle  $\theta$ .** (A) The comparison of fitted  $\theta$  of simulated  
864 clathrin coat structures to corresponding ground-truth  $\theta$  shows no systematic bias and a narrow spread of the  
865 error across the ground-truth although the spread increases when  $\theta < 20^\circ$  or  $\theta > 160^\circ$ . We reasoned that in  
866 the earlier range, where the structures are flat, the slightly increased error corresponds to the insensitivity of  $\theta$   
867 to flat structures. In the later range, where the vesicles are almost closed, the error was caused by undisguisable  
868 tiny holes corresponding to the real vesicle openings and unlabeled clathrin in the coat. The fitted structures were  
869 simulated to have similar quality as the experimental data and to distribute evenly across  $\theta$ . (B) The distribution  
870 of  $\theta$  shows no significant error compared to the expectation corresponding to the evenly distributed  $\theta$ , except  
871 for the small potential underestimation of entirely closed coats.

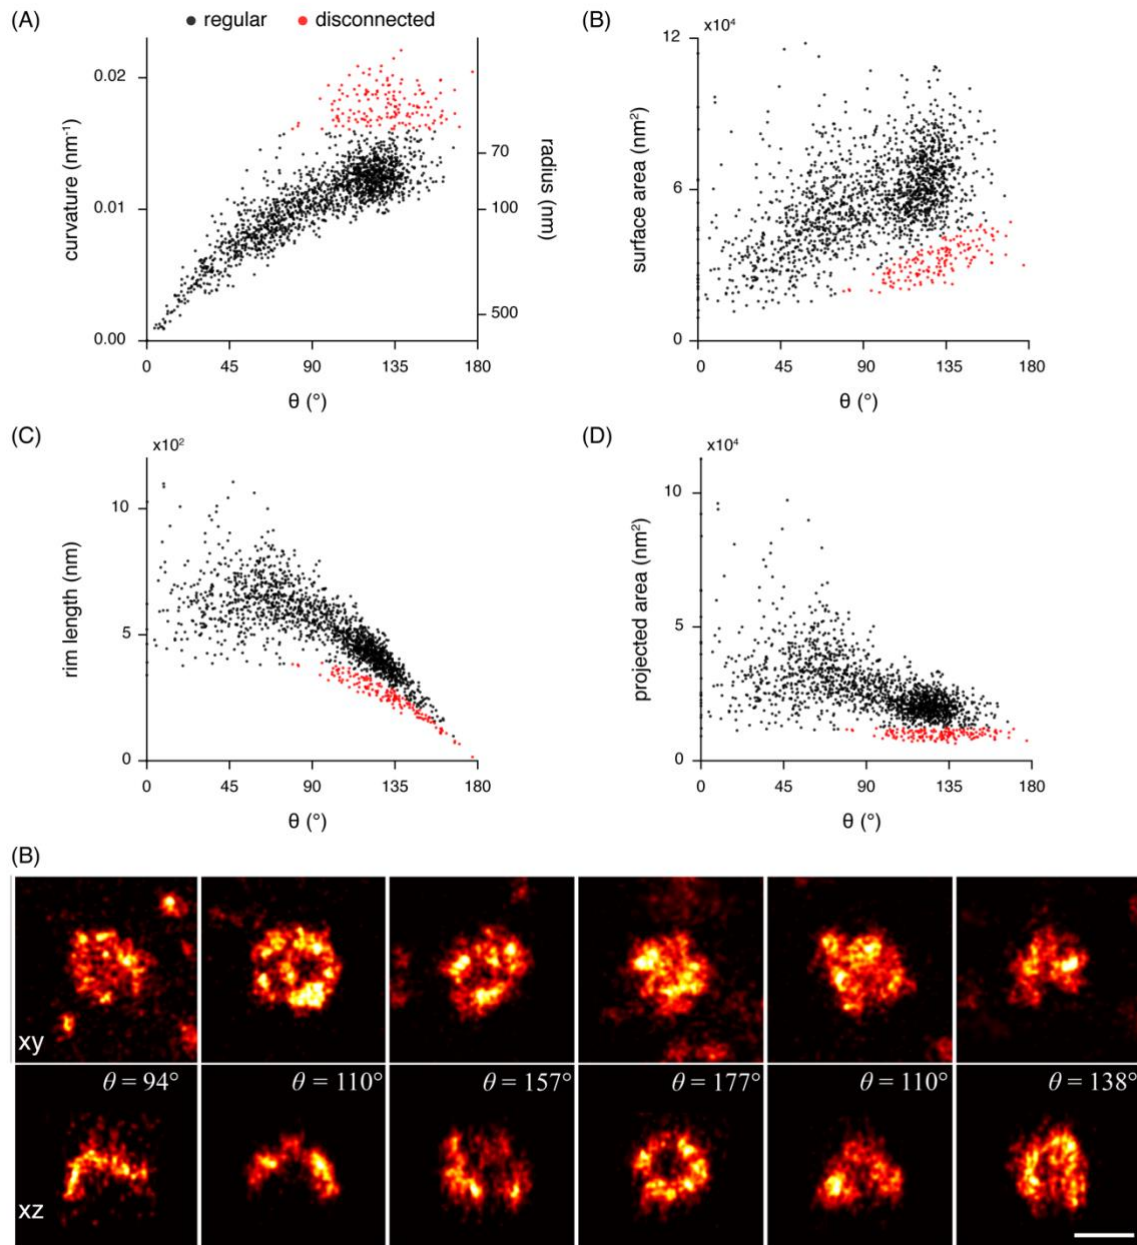

872

873 **Supplementary Figure 3 – Non-endocytic clathrin structures.** Results of LocMoFit analysis of clathrin structures  
 874 in SK-MEL-2 cells ( $N = 13$  cells,  $n = 1798$  sites). (A) A strong correlation between curvature and  $\theta$  can be observed  
 875 for most structures ( $n = 1645$  sites, black). A disconnected point cloud ( $n = 153$  sites, 8.5%, red) indicates the  
 876 presence of endocytosis-unrelated clathrin structures. The same distinct population of data points can be  
 877 observed for the (B) surface area, (C) rim length, and (D) projected area. (B) Example structures from the  
 878 disconnected population of sites in top view (xy) and 50 nm-thick z-slices (xz) and their respective  $\theta$  values. Scale  
 879 bar is 100 nm.

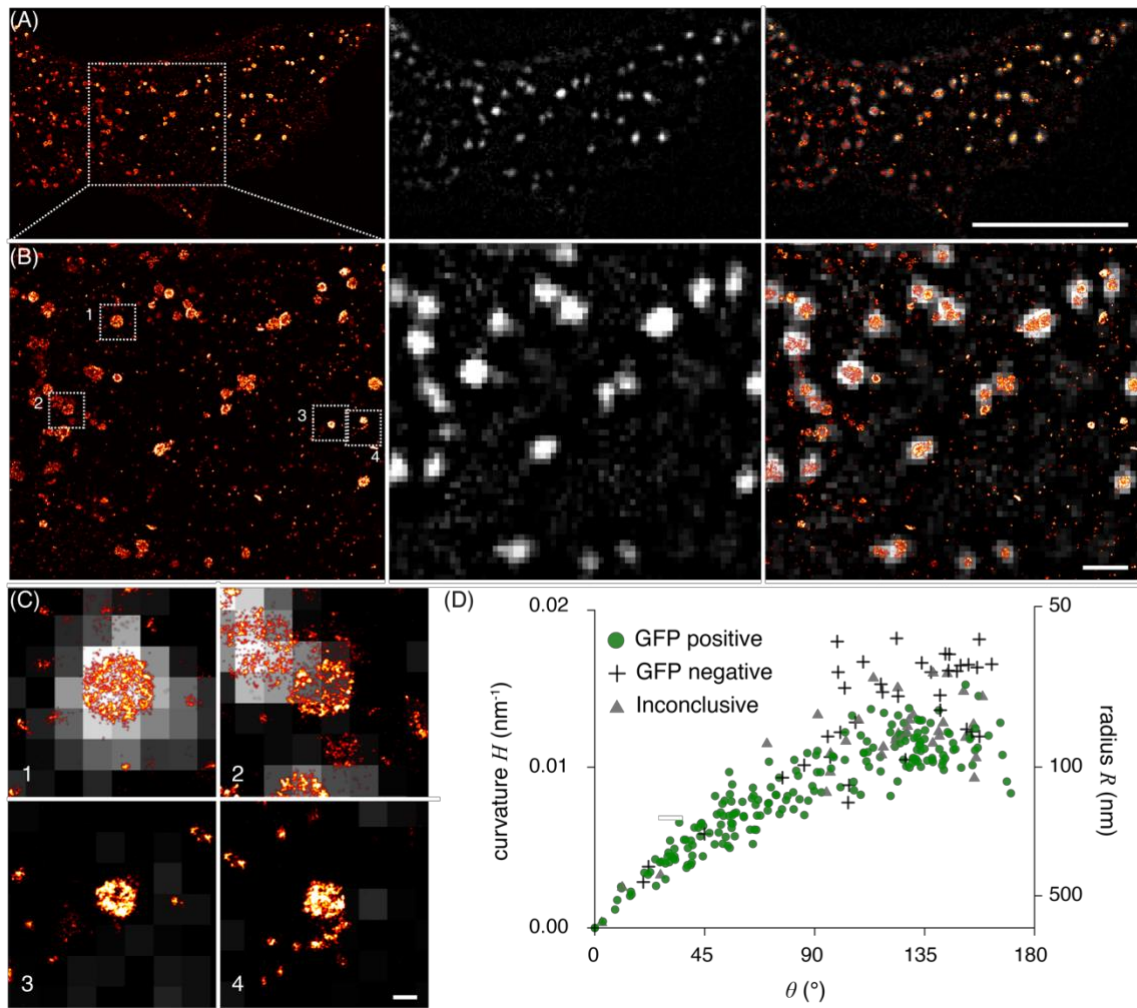

880

881 **Supplementary Figure 4 – Analysis of clathrin coats not following general trajectory of curvature generation.**

882 (A) 3T3 cell transiently overexpressing AP2-GFP. (left) Single-molecule localization microscopy image of  
883 immunolabeled clathrin. (middle) Diffraction limited image of the AP2-GFP signal. (right) Overlay of the two  
884 targets (scale bar: 10  $\mu\text{m}$ ). (B) Enlarged image of the section indicated in (A) (scale bar: 1  $\mu\text{m}$ ). (C) Example sites  
885 indicated in (B) (scale bar: 100 nm). (1) Example for a structure annotated as “GFP positive”. (2) Example for an  
886 “inconclusive” GFP signal. (3 and 4) Example of “GFP negative” structures”. (D) Analysis results when estimating  
887 theta and curvature from clathrin structures, and annotating them depending on their AP2 signal. ( $N = 3$  cells  
888 and  $n = 277$  sites). No AP2-GFP positive structures are found in the disconnected population of sites, suggesting  
889 that they are most likely not generated via clathrin mediated endocytosis.



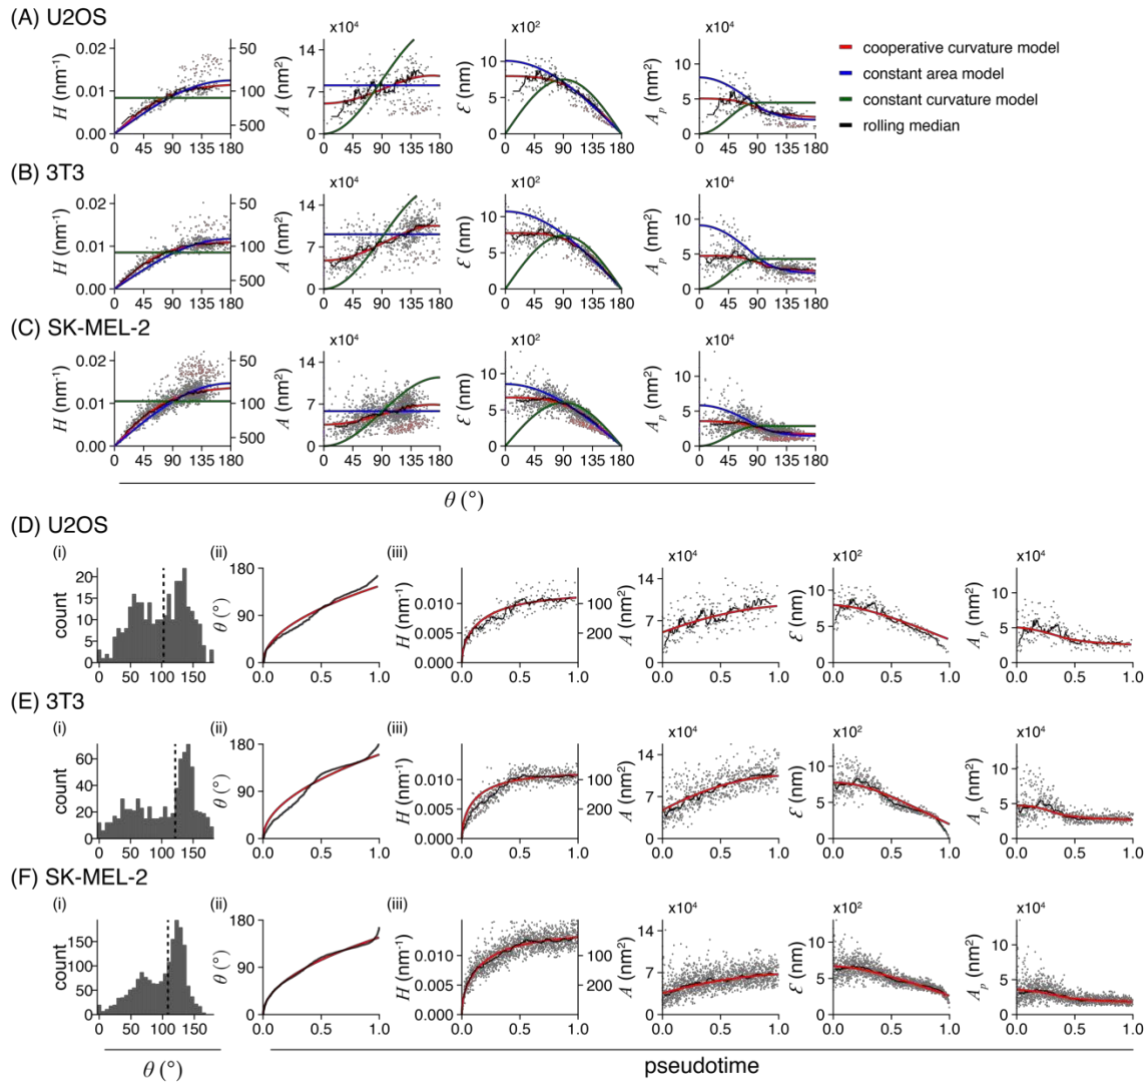

890

891 **Supplementary Figure 5 – Clathrin coat remodeling in three different cell lines.** (A-C) Results of LocMoFit  
 892 analysis for clathrin structures. Different growth models are fitted to curvature  $H$  over  $\theta$ . The resulting fitting  
 893 parameters are then used to map the same models also over surface area, rim length, and projected area (left  
 894 to right). Purple: completely flat sites with  $H = 0 \text{ nm}^{-1}$  and  $\theta = 0$ . Red: disconnected sites that were excluded from  
 895 the fitting. Black line: rolling median (window width = 5% of total number of sites) (A) U2OS ( $N = 3$  cell,  $n_{\text{grey}} =$   
 896  $241$  sites,  $n_{\text{red}} = 53$  disconnected sites,  $n_{\text{purple}} = 1$  completely flat sites), (B) 3T3 mouse fibroblasts ( $N = 7$  cells,  $n_{\text{grey}} =$   
 897  $688$  sites,  $n_{\text{red}} = 51$  disconnected sites,  $n_{\text{purple}} = 8$  completely flat sites), and (C) SK-MEL-2 cells ( $N = 13$  cells,  $n_{\text{grey}} =$   
 898  $1631$  sites,  $n_{\text{red}} = 153$  disconnected sites,  $n_{\text{purple}} = 14$  completely flat sites). (D-F) Temporal reconstruction of  
 899 clathrin coat remodeling. (i) Distribution of  $\theta$  slightly differs between cell lines, especially in the earlier states.  
 900 Median  $\theta$  shown as dotted lines correspond to  $99.6^\circ$  for U2OS;  $121.4^\circ$  for 3T3; and  $108.5^\circ$  for SK-MEL-2 cells. (ii)  
 901 The cooperative curvature model (red line) highlights the square-root dependence between  $\theta$  and pseudotime.  
 902 (iii) The cooperative curvature model is used to describe the curvature  $H$  propagation over pseudotime. Resulting  
 903 fitting parameters are then used to map the same model to surface area  $A$ , rim length  $\epsilon$  and projected area  $A_p$ .  
 904 A rolling median is plotted for in black (window width = 5% of total number of sites).



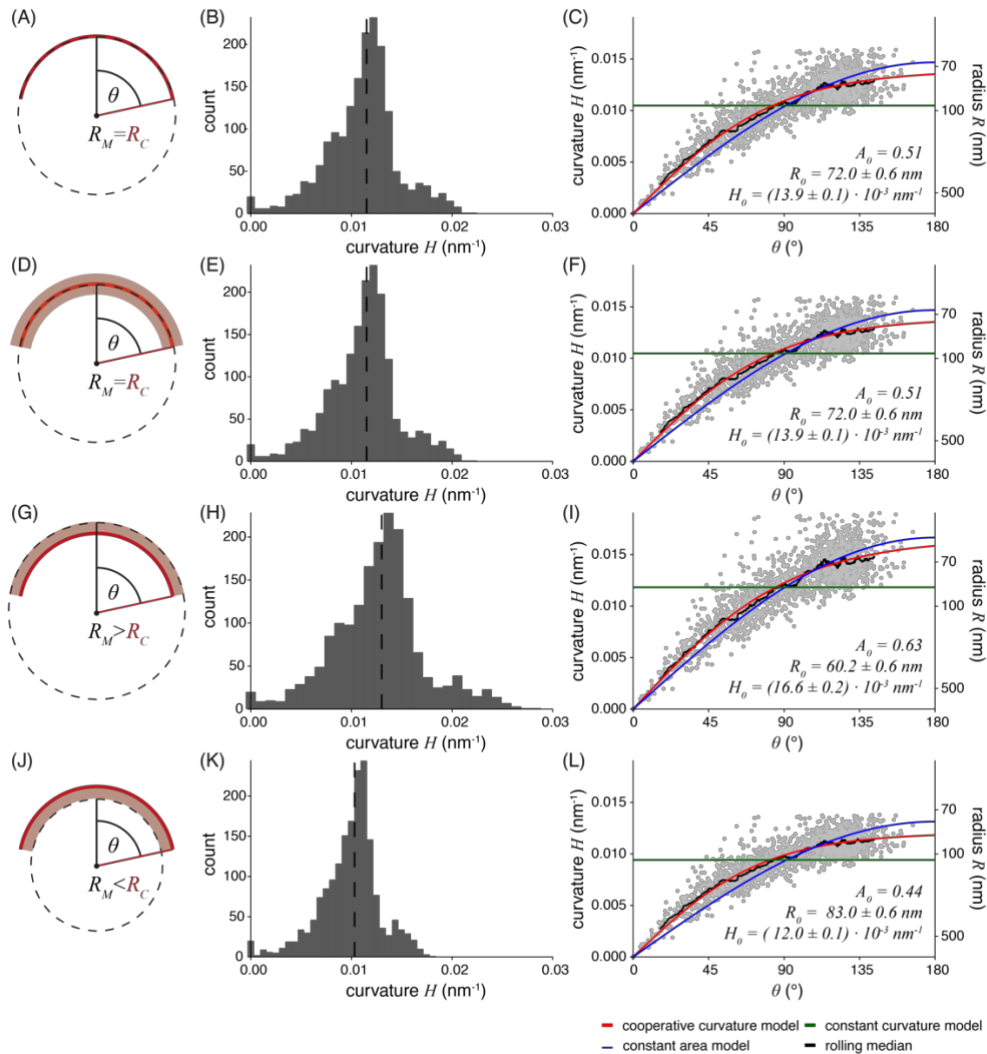

905

906 **Supplementary Figure 6 – Impact of linkage error on geometric model fit.** Indirect immunolabeling displaces  
 907 the label from the target molecule by two antibodies. This generates a so-called linkage error of on average  
 908  $\pm 10$  nm, and resulting localizations might not accurately represent the underlying structure of interest (Früh et  
 909 al., 2021). (A) Ideal case of no linkage error, where the model (dotted black line) with radius  $R_M$  accurately  
 910 represents the underlying clathrin coat (red) with a radius  $R_C$ . (B) Histogram of quantified curvature with a  
 911 median of  $0.011 \text{ nm}^{-1}$ . (C) Models fitted to curvature propagation over theta  $\theta$ . (D) Uniform displacement of  
 912 localizations (light red,  $\pm 10$  nm) due to unbiased labelling by the antibodies. The radius  $R_M$  still accurately  
 913 represents the true radius  $R_C$ . (E) Histogram of the curvature, assuming no needed correction of  $R_M$ . Median:  
 914  $0.011 \text{ nm}^{-1}$ . (F) Models fitted to curvature propagation over theta  $\theta$  remain the same as for (C). (G) Biased labeling  
 915 of the antibodies (light red,  $+ 10$  nm) could result in an overestimation of  $R_M$  by 10 nm. (H) Histogram of the  
 916 curvature corrected by subtracting 10 nm from quantified  $R_M$ . Median:  $0.013 \text{ nm}^{-1}$ . (I) Models fitted to corrected  
 917 curvature propagation over theta  $\theta$ . (J) Biased labeling could result in an underestimation of  $R_M$  by 10 nm. (K)  
 918 Histogram of the curvature corrected for the overestimation in radius by adding 10 nm from quantified  $R_M$ .  
 919 Median:  $0.010 \text{ nm}^{-1}$ . (L) Models fitted to corrected curvature propagation over theta. (C; F; I; L) Fitting parameters  
 920 are  $A_0$ : Fraction of surface area growing as a flat lattice before curvature initiation, defined as  $A_0 = A(\theta =$   
 921  $0.01)/A(\theta = \pi)$ ;  $R_0$ : preferred radius of the clathrin coat fitted with CoopCM;  $H_0$ : Preferred curvature of the  
 922 clathrin coat fitted with CoopCM. While the fitting parameters scale with the error in radius estimation, the  
 923 relationships among the parameters and thus our mechanistic interpretation by the cooperative curvature model  
 924 still holds true.

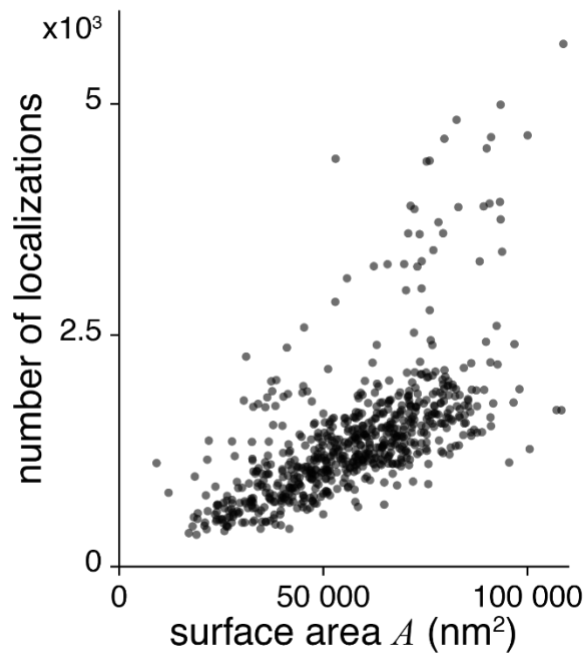

925

926 **Supplementary Figure 7 – Number of localizations versus surface area.** For  $N = 6$  SK-MEL-2 cells,  $n = 700$  sites

927 the number of localizations found in one clathrin coated structure was extracted. This is plotted against the

928 quantified surface area determined for each coat.

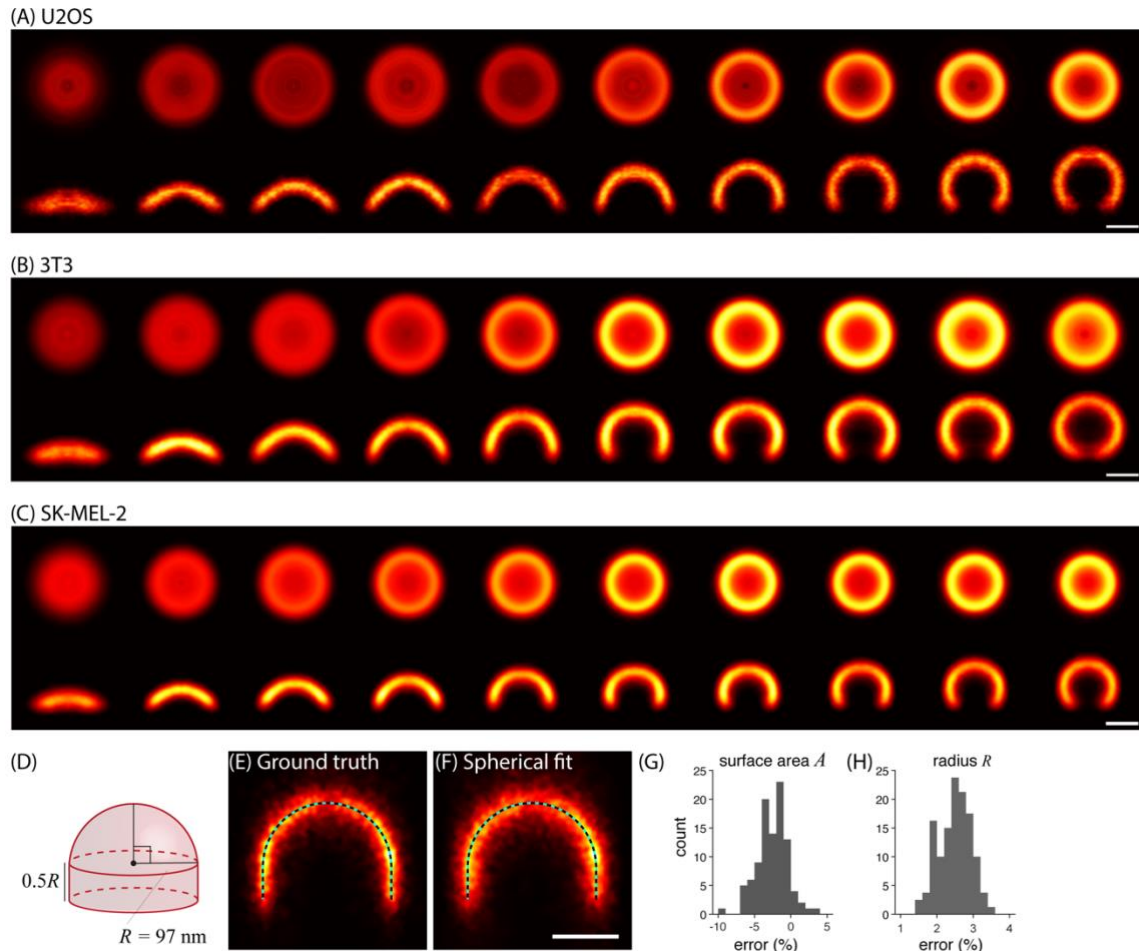

929

930 **Supplementary Figure 8 – Averaging of clathrin coated structures.** (A-C) Averages for distinct endocytic stages,  
 931 resulting from all collected snapshots for (A) U2OS ( $n = 241$  sites,  $N = 3$  cells), (B) 3T3 ( $n = 688$  sites,  $N = 7$  cells),  
 932 and (C) SK-MEL-2 cells ( $n = 1645$  sites,  $N = 13$  cells). Each bin contains the same number of snapshots of clathrin-  
 933 coated structures sorted along their pseudotime ( $n_{U2OS} = 24$  per bin,  $n_{3T3} = 68$ ,  $n_{SK-MEL-2} = 164$ ), so that all bins  
 934 represent equally long pseudotime intervals. (D-H) Averaging preserves U-shapes in simulated endocytic sites.  
 935 (D) A ground-truth structure was used for simulating U-shaped clathrin coats. The model for simulation was built  
 936 by combining a hemisphere with a radius of  $R = 97 \text{ nm}$  and a cylinder with the height  $D = 0.5 R$ . We choose the  
 937 radius value according to the median radius of bin 6 in Figure 4G. This bin has a closing angle slightly larger than  
 938  $90^\circ$ . 20-nm thick cross-sections of the averages ( $N = 100$  sites) registered based on (E) the ground truth and (F)  
 939 the spherical fit are shown with the ground-truth U-shaped model (dotted line). Histograms of normalized  
 940 estimation errors are shown for the parameters (G) surface area and (H) radius, with mean values of  $-2.6\%$  and  
 941  $2.5\%$  respectively. The scale bar is  $100 \text{ nm}$ .

942

943

944 **Table 1 – Summary of clathrin coat growth model fits in SK-MEL-2.** Fitted parameter values for the constant  
 945 area model (CAM), the constant curvature model (CCM) and the cooperative curvature model (CoopCM) when  
 946 fitting curvature  $H(\theta)$ , surface area  $A(\theta)$ , rim length  $\mathcal{E}(\theta)$  and projected area  $A_p(\theta)$ . A: Surface area fitted with  
 947 CAM; R: Radius fitted with CCM;  $\gamma$ : Constant rate of curvature increase fitted with CoopCM;  $H_0$ : Preferred  
 948 curvature of the clathrin coat fitted with CoopCM;  $R_0$ : preferred radius of the clathrin coat fitted with CoopCM;  
 949  $A_0$ : Fraction of surface area growing as a flat lattice before curvature initiation, defined as  $A_0 = A(\theta =$   
 950  $0.01)/A(\theta = \pi)$ ;  $k_{on}$ : local growth rate obtained from  $\theta(t)$  fitted with CoopCM and measured in nm per  
 951 pseudotime units  $\tilde{s}^{-1}$ .  $N = 13$  cells;  $n = 1645$  sites.

|               |                            | Curvature $H(\theta)$                          | Surface area $A(\theta)$                       | Rim length $\mathcal{E}(\theta)$               | Projected area $A_p(\theta)$                   |
|---------------|----------------------------|------------------------------------------------|------------------------------------------------|------------------------------------------------|------------------------------------------------|
| <b>CAM</b>    | <b>A</b>                   | $58300 \pm 400 \text{ nm}^2$                   | $56600 \pm 400 \text{ nm}^2$                   | $49400 \pm 500 \text{ nm}^2$                   | $48800 \pm 500 \text{ nm}^2$                   |
| <b>CCM</b>    | <b>R</b>                   | $94.5 \pm 0.7 \text{ nm}$                      | $84.8 \pm 0.4 \text{ nm}$                      | $97.3 \pm 0.8 \text{ nm}$                      | $92.8 \pm 0.7 \text{ nm}$                      |
| <b>CoopCM</b> | <b><math>\gamma</math></b> | $(9.4 \pm 0.1) \cdot 10^{-3} \text{ nm}^{-1}$  | $(9.0 \pm 0.1) \cdot 10^{-3} \text{ nm}^{-1}$  | $(9.4 \pm 0.1) \cdot 10^{-3} \text{ nm}^{-1}$  | $(9.1 \pm 0.1) \cdot 10^{-3} \text{ nm}^{-1}$  |
|               | <b><math>H_0</math></b>    | $(13.9 \pm 0.1) \cdot 10^{-3} \text{ nm}^{-1}$ | $(13.8 \pm 0.1) \cdot 10^{-3} \text{ nm}^{-1}$ | $(13.4 \pm 0.1) \cdot 10^{-3} \text{ nm}^{-1}$ | $(13.6 \pm 0.1) \cdot 10^{-3} \text{ nm}^{-1}$ |
|               | <b><math>R_0</math></b>    | $72.0 \pm 0.6 \text{ nm}$                      | $72.2 \pm 0.6 \text{ nm}$                      | $74 \pm 0.8 \text{ nm}$                        | $73.4 \pm 0.9 \text{ nm}$                      |
|               | <b><math>A_0</math></b>    | 0.51                                           | 0.55                                           | 0.49                                           | 0.52                                           |
|               | <b><math>k_{on}</math></b> | $78.1 \text{ nm}\tilde{s}^{-1}$                | $72.2 \text{ nm}\tilde{s}^{-1}$                | $83.4 \text{ nm}\tilde{s}^{-1}$                | $78 \text{ nm}\tilde{s}^{-1}$                  |

952 **Table 2 – Summary of clathrin coat growth model fits in U2OS.** Fitted parameter values for the constant area  
 953 model (CAM), the constant curvature model (CCM) and the cooperative curvature model (CoopCM) when fitting  
 954 curvature  $H(\theta)$ , surface area  $A(\theta)$ , rim length  $\mathcal{E}(\theta)$  and projected area  $A_p(\theta)$ . A: Surface area fitted with CAM;  
 955 R: Radius fitted with CCM;  $\gamma$ : Constant rate of curvature increase fitted with CoopCM;  $H_0$ : Preferred curvature of  
 956 the clathrin coat fitted with CoopCM;  $R_0$ : preferred radius of the clathrin coat fitted with CoopCM;  $A_0$ : Fraction of  
 957 surface area growing as a flat lattice before curvature initiation, defined as  $A_0 = A(\theta = 0.01)/A(\theta = \pi)$ ;  $k_{on}$ :  
 958 local growth rate obtained from  $\theta(t)$  fitted with CoopCM and measured in nm per pseudotime units  $\tilde{s}^{-1}$ .  $N = 3$   
 959 cells;  $n = 241$  sites.

|               |                            | Curvature $H(\theta)$                          | Surface area $A(\theta)$                       | Rim length $\mathcal{E}(\theta)$               | Projected area $A_p(\theta)$                   |
|---------------|----------------------------|------------------------------------------------|------------------------------------------------|------------------------------------------------|------------------------------------------------|
| <b>CAM</b>    | <b>A</b>                   | $80800 \pm 1600 \text{ nm}^2$                  | $76900 \pm 1700 \text{ nm}^2$                  | $65900 \pm 1600 \text{ nm}^2$                  | $65400 \pm 1600 \text{ nm}^2$                  |
| <b>CCM</b>    | <b>R</b>                   | $119.1 \pm 2.5 \text{ nm}$                     | $101.6 \pm 1.5 \text{ nm}$                     | $122.8 \pm 2.7 \text{ nm}$                     | $115 \pm 2.4 \text{ nm}$                       |
| <b>CoopCM</b> | <b><math>\gamma</math></b> | $(7.9 \pm 0.2) \cdot 10^{-3} \text{ nm}^{-1}$  | $(7.7 \pm 0.2) \cdot 10^{-3} \text{ nm}^{-1}$  | $(8.1 \pm 0.2) \cdot 10^{-3} \text{ nm}^{-1}$  | $(7.9 \pm 0.2) \cdot 10^{-3} \text{ nm}^{-1}$  |
|               | <b><math>H_0</math></b>    | $(11.8 \pm 0.2) \cdot 10^{-3} \text{ nm}^{-1}$ | $(11.5 \pm 0.2) \cdot 10^{-3} \text{ nm}^{-1}$ | $(11.0 \pm 0.3) \cdot 10^{-3} \text{ nm}^{-1}$ | $(11.1 \pm 0.3) \cdot 10^{-3} \text{ nm}^{-1}$ |
|               | <b><math>R_0</math></b>    | $85.0 \pm 1.8 \text{ nm}$                      | $87.1 \pm 1.7 \text{ nm}$                      | $90.5 \pm 2.7 \text{ nm}$                      | $90.2 \pm 2.6 \text{ nm}$                      |
|               | <b><math>A_0</math></b>    | 0.52                                           | 0.52                                           | 0.45                                           | 0.47                                           |
|               | <b><math>k_{on}</math></b> | $89.3 \text{ nm}\tilde{s}^{-1}$                | $91.5 \text{ nm}\tilde{s}^{-1}$                | $110.3 \text{ nm}\tilde{s}^{-1}$               | $105.5 \text{ nm}\tilde{s}^{-1}$               |

960 **Table 3 – Summary of clathrin coat growth model fits in 3T3 mouse fibroblasts.** Fitted parameter values for the  
 961 constant area model (CAM), the constant curvature model (CCM) and the cooperative curvature model (CoopCM)  
 962 when fitting curvature  $H(\theta)$ , surface area  $A(\theta)$ , rim length  $\mathcal{E}(\theta)$  and projected area  $A_p(\theta)$ . A: Surface area  
 963 fitted with CAM; R: Radius fitted with CCM;  $\gamma$ : Constant rate of curvature increase fitted with CoopCM;  $H_0$ :  
 964 Preferred curvature of the clathrin coat fitted with CoopCM;  $R_0$ : preferred radius of the clathrin coat fitted with  
 965 CoopCM;  $A_0$ : Fraction of surface area growing as a flat lattice before curvature initiation, defined as  $A_0 = A(\theta =$   
 966  $0.01)/A(\theta = \pi)$ ;  $k_{on}$ : local growth rate obtained from  $\theta(t)$  fitted with CoopCM and measured in nm per  
 967 pseudotime units  $\tilde{s}^{-1}$ .  $N = 7$  cells;  $n = 688$  sites.

|               |                            | Curvature $H(\theta)$                          | Surface area $A(\theta)$                       | Rim length $\mathcal{E}(\theta)$               | Projected area $A_p(\theta)$                   |
|---------------|----------------------------|------------------------------------------------|------------------------------------------------|------------------------------------------------|------------------------------------------------|
| <b>CAM</b>    | <b>A</b>                   | $90100 \pm 1000 \text{ nm}^2$                  | $83700 \pm 1000 \text{ nm}^2$                  | $65800 \pm 1000 \text{ nm}^2$                  | $66200 \pm 1000 \text{ nm}^2$                  |
| <b>CCM</b>    | <b>R</b>                   | $115.8 \pm 1.5 \text{ nm}$                     | $98.3 \pm 0.7 \text{ nm}$                      | $121.1 \pm 2 \text{ nm}$                       | $108.5 \pm 1.5 \text{ nm}$                     |
| <b>CoopCM</b> | <b><math>\gamma</math></b> | $(8.2 \pm 0.1) \cdot 10^{-3} \text{ nm}^{-1}$  | $(7.8 \pm 0.1) \cdot 10^{-3} \text{ nm}^{-1}$  | $(7.9 \pm 0.1) \cdot 10^{-3} \text{ nm}^{-1}$  | $(7.8 \pm 0.1) \cdot 10^{-3} \text{ nm}^{-1}$  |
|               | <b><math>H_0</math></b>    | $(11.3 \pm 0.1) \cdot 10^{-3} \text{ nm}^{-1}$ | $(11.2 \pm 0.1) \cdot 10^{-3} \text{ nm}^{-1}$ | $(11.2 \pm 0.2) \cdot 10^{-3} \text{ nm}^{-1}$ | $(11.2 \pm 0.2) \cdot 10^{-3} \text{ nm}^{-1}$ |
|               | <b><math>R_0</math></b>    | $88.8 \pm 0.7 \text{ nm}$                      | $89.3 \pm 0.7 \text{ nm}$                      | $89.1 \pm 1.4 \text{ nm}$                      | $89.5 \pm 1.3 \text{ nm}$                      |
|               | <b><math>A_0</math></b>    | 0.45                                           | 0.49                                           | 0.47                                           | 0.49                                           |
|               | <b><math>k_{on}</math></b> | $128.4 \text{ nm}\tilde{s}^{-1}$               | $120.8 \text{ nm}\tilde{s}^{-1}$               | $123.9 \text{ nm}\tilde{s}^{-1}$               | $121 \text{ nm}\tilde{s}^{-1}$                 |

968 **Supplementary data**

969 Supplementary data can be downloaded from  
970 <https://oc.embl.de/index.php/s/sszVT1ZAUB2LOFW> and will be uploaded to the BioStudies  
971 image data repository (<https://www.ebi.ac.uk/biostudies/>) upon publication.

972

973 ***Supplementary movie (mp4 format, 1 file)***

974 Pseudo-temporal movie of clathrin coat remodeling during endocytosis in SK-MEL-2 cells.  
975 Each frame corresponds to a sliding window average of 30 sites, with a frame-to-frame  
976 increment of 20 sites. The median pseudotime of those 30 sites is indicated.

977

978 ***Localization data (csv format, 23 files)***

979 Localization coordinates for all superresolution images, grouped by cell line (SK-MEL-2, 13  
980 files; U2OS, 3 files; 3T3, 7 files).

981 The localizations were grouped (localizations that persisted over several adjacent frames and  
982 thus resulted from the same single fluorophore were combined into one localization) and  
983 filtered with a maximum localization precision of 20 nm in xy, and 30 nm in z. The first 2000  
984 frames of each acquisition are excluded, since the blinking density is too high for reliable  
985 localization. Each file contains the columns *xnm* (x coordinate in nm); *ynm* (y coordinate in  
986 nm); *znm* (z coordinate in nm); *locprecnm* (localization precision in xy in nm); *locprecznm*  
987 (localization precision in z in nm); *frame*; *site\_ID* (marks all localizations belonging to the  
988 respective segmented clathrin structure; localizations outside of analyzed sites are put to 0);  
989 *filename* (identifier for acquisition file, unique for each cell line).

990 Identifiers for acquisition files and clathrin-coated structures are kept consistent between all  
991 supplementary data.

992

993 ***Model fit results (csv format, 23 files)***

994 Results from LocMoFit analysis of individual clathrin coated structures, grouped by cell line.  
995 Columns are *ID* (identifier for individual structures); *file\_number* (identifier for each  
996 acquisition file); *cell\_line*; *disconnected\_sites* (true for those sites that are disconnected from  
997 the main data cloud, see Supplementary Figures 2, 3). Model fit parameters calculated for  
998 each structure using LocMoFit include theta  $\theta$ ; radius  $R$ ; curvature  $H$ ; surface\_area  $A$ ;  
999 rim\_length  $\epsilon$ ; and projected\_area  $A_p$ . Further included in the table are the corrected values  
1000 theta\_corrected and curvature corrected, where each structure fitted with a negative radius  
1001 was manually put to  $\theta = 0.0001^\circ$  and curvature = 0 nm<sup>-1</sup>.

1002

1003 ***Site gallery (PDF format, 3 files)***

1004 Snapshots of all analyzed clathrin coated structure and their respective model fit results.

1005 For each structure, shown are the top view (left), as well as 50 nm side-view cross-sections  
1006 through the structure at angles  $0^\circ$ ,  $45^\circ$ ,  $90^\circ$  and  $135^\circ$  (left to right). Shown are site number,  
1007 theta  $\theta$ , surface area  $A$ , and radius  $R$ . Scale bar is 100 nm.

1008

1009 ***Movie gallery (mp4 format, 49 files)***

1010 Rotating movies of the 3D SMLM data (left) and renderings of the corresponding models  
1011 (right) of all clathrin-coated structures in SK-MEL-2 cells. Shown are site identifiers and model  
1012 fit results (theta  $\theta$ , surface area  $A$ , and radius  $R$ ). Scale bar is 100 nm.



## Supplementary note to: Superresolution microscopy reveals partial preassembly and subsequent bending of the clathrin coat during endocytosis

Markus Mund, Aline Tschanz, Yu-Le Wu, Felix Frey, Johanna Mehl,  
Marko Kaksonen, Ori Avinoam, Ulrich S. Schwarz, and Jonas Ries

### I. COOPERATIVE CURVATURE MODEL

We derive a kinetic model for clathrin-mediated endocytosis that is based on minimal assumptions based on our experimental observations. We first assume that the area  $A$  of clathrin coats grows mainly by addition of new triskelia at the edges [1]. With a local growth rate  $k_{\text{on}}$  and an edge length  $\mathcal{E}$ , we have the simple growth law

$$\frac{d}{dt}A = \dot{A} = k_{\text{on}}\mathcal{E}. \quad (1)$$

We also know from our experimental observations that all clathrin-coated pits have the geometry of a spherical cap with area  $A_{\text{cap}} = 2\pi R^2(1 - \cos\theta)$ , where  $R$  is the cap radius and  $\theta$  the closing angle. The edge length then is  $\mathcal{E}_{\text{cap}} = 2\pi R \sin\theta$ . Using these formulas on Eq. (1) we find

$$2\dot{R} \tan \frac{\theta}{2} + R\dot{\theta} = k_{\text{on}}. \quad (2)$$

Because we parametrize the shape of the growing clathrin coat by the two dynamical variables  $R(t)$  and  $\theta(t)$ , but have only one growth equation up to now, we have to make additional assumptions to completely define our kinetic model.

As the main function of clathrin is to generate curvature, we now focus on coat curvature  $H = 1/R$  and assume that it increases with a basal rate  $\gamma$ . Experimentally we observe that clathrin patches first grow flat and then start to curve. Curvature generation in clathrin lattices is the combination of a preferred curvature of the single triskelion and cooperative effects in the lattice [2, 3]. Several mechanisms exist that might generate curvature during coat growth. First, clathrin triskelia are likely to be geometrically frustrated within the flat clathrin coat. To overcome this frustration, they would have to adjust their positions relative to their neighbors, such that their free energy is getting more favorable. Second, lattice vacancies could be filled up with new triskelia, as predicted theoretically [4]. Note that these vacancies would not necessarily relate to patch area, because the clathrin lattice consists of many overlapping arms. Filling of vacancies would however increase clathrin density and coat stiffness, and thus could also drive invagination of the coat [5]. We note that it was indeed confirmed experimentally that the clathrin density increases within the coat during invagination [2, 6]. Third, lattice pentagons, associated with lattice curvature, could form at the edge of the clathrin lattice and diffuse into the coat, similar to lattice defects on curved surfaces [7]. All three mechanisms could generate curvature with a certain rate which we assume to be constant during the initial stages of growth.

At late stages, increase of curvature has to stop and therefore we assume curvature saturation at a characteristic value  $H_0$ , which is similar to, but different from the radius measured for clathrin cages. A simple estimate would be 40 nm for a typical radius of the membranes in the pits [8] plus 15 nm thickness of the clathrin coat [9]. These 55 nm would be larger than the 40 nm for clathrin cages, which are expected to be frustrated. If all triskelia in the lattice had achieved their optimal positions, a preferred or spontaneous curvature  $H_0$  should emerge. Thus a growth equation for  $H$  should have a stable fixed point generated by a higher order term. Since the corresponding mechanism is known to be of cooperative nature, larger groups of triskelia should be involved and the mechanism should start to dominate relatively late in the process, but then dominate quickly. Here we assume that the mechanism is proportional to  $H^2$  (rather than to  $H$ , with a linear law corresponding to a non-cooperative effect that starts to show early). Assuming that curvature generation is a geometrical effect, its time development should depend on the closing angle and we get

$$\frac{dH}{d\theta} = \gamma \left( 1 - \frac{H^2}{H_0^2} \right). \quad (3)$$

The stable fixed point at  $H = H_0$  can then be interpreted as corresponding to the preferred curvature of the mature coat.

Eq. (3) can be solved with the initial condition  $H(\theta = 0) = 0$  by

$$H(\theta) = H_0 \tanh \left( \frac{\gamma}{H_0} \theta \right), \quad (4)$$

TABLE I. Coat curvature, coat area, and edge length summarized for the CCM, the CAM, and the CoopCM.

|               | CCM                                   | CAM                                                            | CoopCM                                 |
|---------------|---------------------------------------|----------------------------------------------------------------|----------------------------------------|
| $H$           | $1/R_{\text{CCM}}$                    | $\sqrt{\frac{2\pi(1-\cos\theta)}{A_{\text{CAM}}}}$             | $1/R_{\text{coat}}$                    |
| $A$           | $2\pi R_{\text{CCM}}^2(1-\cos\theta)$ | $A_{\text{CAM}}$                                               | $2\pi R_{\text{coat}}^2(1-\cos\theta)$ |
| $\mathcal{E}$ | $2\pi R_{\text{CCM}} \sin\theta$      | $\sqrt{\frac{2\pi A_{\text{CAM}}}{(1-\cos\theta)}} \sin\theta$ | $2\pi R_{\text{coat}} \sin\theta$      |

and defines the coat radius as a function of the closing angle

$$R_{\text{coat}} = R(\theta) = \frac{1}{H(\theta)} = R_0 \frac{1}{\tanh(\gamma R_0 \theta)}, \quad (5)$$

with  $R_0 = 1/H_0$ . We note that the expansion of Eq. (5) gives  $R \propto 1/\theta$  in leading order around the flat state.

We can combine Eq. (2) and Eq. (3) to find the full dynamics of coat invagination. Therefore, we compute the derivative of  $R_{\text{coat}}$

$$\frac{dR_{\text{coat}}}{d\theta} = -\frac{\gamma R_0^2}{\sinh^2(\gamma R_0 \theta)}. \quad (6)$$

We use Eq. (5) and Eq. (6) and the chain rule  $dR/dt = dR/d\theta d\theta/dt$  to rewrite Eq. (2). Solving for  $\dot{\theta}$  yields

$$\dot{\theta} = k_{\text{on}} \frac{1}{2 \frac{dR(\theta)}{d\theta} \tan \frac{\theta}{2} + R(\theta)}. \quad (7)$$

After expanding Eq. (7) up to leading order in  $\theta$  we find

$$\dot{\theta} = \frac{12\gamma k_{\text{on}}}{8\gamma^2 R_0^2 - 1} \frac{1}{\theta}, \quad (8)$$

which is solved with the initial condition  $\theta(t=0) = 0$  by

$$\theta(t) = \sqrt{\frac{24\gamma k_{\text{on}}}{8\gamma^2 R_0^2 - 1}} t. \quad (9)$$

Thus the coat initially is flat ( $\theta = 0$ ) and then starts to generate curvature, increasing the closing angle with a square root dependence in time, which reflects the slowing down of curvature generation as preferred curvature is approached. We refer to this model as the cooperative curvature model (CoopCM) due to the assumption of a non-linear growth law.

## II. FIT RESULTS

To contrast the CoopCM with existing models, we fit it to experimental data for  $H(\theta)$ ,  $A(\theta)$  and  $\mathcal{E}(\theta)$ . We compare the fitted curves to the constant curvature model (CCM), defined through the constant coat curvature  $1/R_{\text{CCM}}$ , and to the constant area model (CAM), defined through the constant coat area  $A_{\text{CAM}}$ . The equations for the curvature  $H(\theta) = 1/R(\theta)$ , the area  $A(\theta)$ , and the edge length  $\mathcal{E}(\theta)$  are summarized in Table I for all three models. In order to fit, we first filter the data according to curvature  $H$ , as described in the methods section of the main text. We then fit the different models to each of the data sets separately. For the CCM and CAM we get values for one parameter each, namely  $R_{\text{CCM}}$  and  $A_{\text{CAM}}$ , respectively. For the CoopCM we obtain two parameter values  $\gamma$  and  $H_0$ . For the CoopCM we also determine the area when invagination occurs  $A_0 = A(\theta = 0.01)/A(\theta = \pi)$ , which is the relative transition size where the flat-to-curved-transition occurs. By definition, invagination in the CCM starts simultaneously with coat assembly ( $A_0 = 0$ ), while invagination in the CAM starts at the maximum area ( $A_0 = 1$ ). Moreover, for the CoopCM we also compute  $R_0$ . For all parameters we also determine the relative fit errors, given by  $\sigma_x/x$ , where  $\sigma_x$  is the standard deviation of the parameter  $x$  and  $x$  is the value of the parameter. This procedure allows us to compare the fit results to each other. The fitted parameter values for the different models and cell lines are summarized in the Supplementary Tables 1–3.

We then fit Eq. (9) to the data, describing  $\theta(t)$ . Using the values of  $\gamma$  and  $H_0$ , we determine  $k_{\text{on}}$  from the fit. The resulting values, measured in units of the pseudo time  $\bar{s}$ , are summarized in the Supplementary Tables 1–3. We do not show the fit errors of  $k_{\text{on}}$ , because they are small and result from the same fit of  $\theta(t)$  and the errors of  $\gamma$  and  $H_0$ , which does not allow us to discriminate between the different fits.

TABLE II. BIC for the curvature fits  $H(\theta)$  of the CCM, CAM and CoopCM for the analyzed cell lines.

|                | CCM    | CAM    | CoopCM |
|----------------|--------|--------|--------|
| SK-MEL-2 cells | -19079 | -21218 | -21670 |
| c3T3 cells     | -8119  | -9179  | -9498  |
| U2OS cells     | -2784  | -3097  | -3190  |

### III. BAYESIAN INFORMATION CRITERION

Apparently, the CoopCM agrees better with the data compared to the CCM and the CAM. However, while the CCM and the CAM both only include one parameter, the CoopCM has two parameters. In order to base model selection on a statistical criterion and to account for the additional parameter of the CoopCM, we compute the Bayesian information criterion (BIC). The BIC takes into account both how well a model fits the data but also how many free parameters it includes to avoid overfitting. The BIC can be expressed by [10]

$$\text{BIC} = N \ln \left( \frac{\text{RSS}}{N - k} \right) + k \ln N \approx N \ln \left( \frac{\text{RSS}}{N} \right) + k \ln N, \quad (10)$$

where we used that  $N \gg k$  in the last step. Here RSS is the residual sum of squares  $\text{RSS} = \sum_i^N (f(x_i) - y_i)^2$  with  $x_i$  and  $y_i$  the measured data and  $f(x_i)$  the fitted data,  $N$  is the number of data points and  $k$  is the number of free parameters. In general, when comparing different models, the model with the lowest BIC is preferred. In Table II the BIC is calculated from Eq. (10) for the curvature fits  $H(\theta)$  for the different cell lines. For all cell lines, the BIC for the CoopCM is lowest. Therefore, we conclude that the additional parameter of the CoopCM is justified and that the CoopCM agrees best with the data.

### IV. LINEAR CURVATURE MODEL

As an alternative to the CoopCM model we now consider a linear curvature model. As in the CoopCM model, we assume that the coat curvature  $H = 1/R$  increases at a basal rate  $\gamma$ . In contrast to the CoopCM model however, we now assume that the increase in curvature at late stages is slowed down proportional to  $H$  and must stop at a value  $H_0$

$$\frac{dH}{d\theta} = \gamma \left( 1 - \frac{H}{H_0} \right). \quad (11)$$

Eq. (11) can be solved by

$$H(\theta) = H_0 \left( 1 - e^{-\frac{\gamma}{H_0} \theta} \right). \quad (12)$$

Eq. (12) also defines the coat radius  $R = 1/H$  as a function of the invagination angle  $\theta$

$$R(\theta) = R_0 \frac{1}{(1 - e^{-\gamma R_0 \theta})}, \quad (13)$$

with  $R_0 = 1/H_0$ . The derivative of  $R(\theta)$  reads

$$\frac{dR}{d\theta} = -\frac{\gamma R_0^2}{4 \left( \sinh \frac{\gamma R_0 \theta}{2} \right)^2}. \quad (14)$$

Now we use Eq. (13) and Eq. (14) on Eq. (7). After expanding up to second order in  $\theta$  we find

$$\dot{\theta} = \frac{2k_{\text{on}}}{R_0} \left( 1 - \frac{1}{6} \left( 2\gamma R_0 - \frac{1}{\gamma R_0} \right) \theta \right), \quad (15)$$

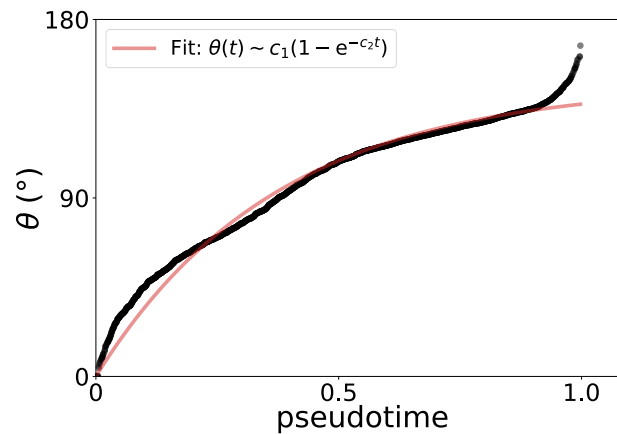

Supplementary Figure 9. Invagination angle  $\theta$  as a function of the pseudotime  $t$ . Red line: the fit to the same data as in Fig. 4B according to Eq. (16) for the linear curvature model.

which is solved by

$$\theta(t) = \frac{1}{R_0} \left( \frac{3\gamma}{2\gamma^2 - \frac{1}{R_0^2}} \right) \left( 1 - e^{-\left( \frac{2\gamma^2 - \frac{1}{R_0^2}}{3\gamma} \right) k_{\text{on}} t} \right). \quad (16)$$

For small  $t$ , Eq. (16) can be expanded to  $\theta(t) \sim (k_{\text{on}}/R_0)t$ . The linear increase of  $\theta$  with  $t$  does not fit the data for small  $t$  (cf. Supplementary Figure 9).

- 
- [1] D. Bucher, F. Frey, K. A. Sochacki, S. Kummer, J.-P. Bergeest, W. J. Godinez, H.-G. Kräusslich, K. Rohr, J. W. Taraska, U. S. Schwarz, *et al.*, Clathrin-adaptor ratio and membrane tension regulate the flat-to-curved transition of the clathrin coat during endocytosis, *Nat. Commun.* **9**, 1109 (2018).
  - [2] W. F. Zeno, J. B. Hochfelder, A. S. Thatte, L. Wang, A. K. Gadok, C. C. Hayden, E. M. Lafer, and J. C. Stachowiak, Clathrin senses membrane curvature, *Biophys. J.* , S0006349521000801 (2021).
  - [3] K. A. Sochacki, B. L. Heine, G. J. Haber, J. R. Jimah, B. Prasai, M. A. Alfonzo-Mendez, A. D. Roberts, A. Somasundaram, J. E. Hinshaw, and J. W. Taraska, The structure and spontaneous curvature of clathrin lattices at the plasma membrane, *bioRxiv* 10.1101/2020.07.18.207258 (2020).
  - [4] F. Frey, D. Bucher, K. A. Sochacki, J. W. Taraska, S. Boulant, and U. S. Schwarz, Eden growth models for flat clathrin lattices with vacancies, *New J. Phys.* **22**, 073043 (2020).
  - [5] F. Frey and U. S. Schwarz, Competing pathways for the invagination of clathrin-coated membranes, *Soft Matter* **16**, 10723 (2020).
  - [6] K. A. Sochacki, A. M. Dickey, M.-P. Strub, and J. W. Taraska, Endocytic proteins are partitioned at the edge of the clathrin lattice in mammalian cells, *Nat. Cell Biol.* **19**, 352–361 (2017).
  - [7] S. Agarwal and S. Hilgenfeldt, Simple, General Criterion for Onset of Disclination Disorder on Curved Surfaces, *Phys. Rev. Lett.* **125**, 078003 (2020).
  - [8] O. Avinoam, M. Schorb, C. J. Beese, J. A. Briggs, and M. Kaksonen, Endocytic sites mature by continuous bending and remodeling of the clathrin coat, *Science* **348**, 1369 (2015).
  - [9] M. Saleem, S. Morlot, A. Hohendahl, J. Manzi, M. Lenz, and A. Roux, A balance between membrane elasticity and polymerization energy sets the shape of spherical clathrin coats, *Nat. Commun.* **6**, 6249 (2015).
  - [10] R. A. Yaffee and M. McGee, *An introduction to time series analysis and forecasting: with applications of SAS® and SPSS®* (Elsevier, 2000).
